1 **Title:**

2 Human noise blindness drives suboptimal cognitive inference

3 **Authors:**

4 Santiago Herce Castañón<sup>1,2,\*</sup>, Dan Bang<sup>3</sup>, Rani Moran<sup>3,4</sup>, Jacqueline Ding<sup>1</sup>, Tobias Egner<sup>5,6</sup>,  
5 Christopher Summerfield<sup>1</sup>

6 **Affiliations:**

7 <sup>1</sup>Department of Experimental Psychology, University of Oxford, Oxford OX1 3UD, UK.

8 <sup>2</sup>Department of Psychology and Educational Sciences, University of Geneva, Switzerland.

9 <sup>3</sup>Wellcome Centre for Human Neuroimaging, University College London, London WC1N 3BG,  
10 UK.

11 <sup>4</sup>Max Planck UCL Centre for Computational Psychiatry and Ageing Research, London WC1B  
12 5EH, UK

13 <sup>5</sup>Center for Cognitive Neuroscience, Duke University, Durham, North Carolina 27710, USA

14 <sup>6</sup>Department of Psychology and Neuroscience, Duke University, Durham, North Carolina 27708-  
15 0086, USA

16 \*Correspondence: [santiagohc@gmail.com](mailto:santiagohc@gmail.com)

17 **Abstract**

18 Humans typically make near-optimal sensorimotor judgments but show systematic biases when  
19 making more cognitive judgments. Here we test the hypothesis that, while humans are sensitive to  
20 the noise present during early sensory processing, the “optimality gap” arises because they are  
21 blind to noise introduced by later cognitive integration of variable or discordant pieces of  
22 information. In six psychophysical experiments, human observers judged the average orientation  
23 of an array of contrast gratings. We varied the stimulus contrast (encoding noise) and orientation  
24 variability (integration noise) of the array. Participants adapted near-optimally to changes in  
25 encoding noise, but, under increased integration noise, displayed a range of suboptimal behaviours:  
26 they ignored stimulus base rates, reported excessive confidence in their choices, and refrained from  
27 opting out of objectively difficult trials. These overconfident behaviours were captured by a  
28 Bayesian model which is blind to integration noise. Our study provides a computationally  
29 grounded explanation of suboptimal cognitive inferences.

30 The question of whether humans make optimal choices has received considerable attention  
31 in the neural, cognitive and behavioural sciences. On one hand, the general consensus in sensory  
32 psychophysics and sensorimotor neuroscience is that choices are near-optimal. For example,  
33 humans have been shown to combine different sources of stimulus information in a statistically  
34 near-optimal manner, weighting each source by its reliability (Ernst & Banks, 2002; Knill, Kersten,  
35 & Yuille, 1996; Körding & Wolpert, 2006; Ma, Beck, Latham, & Pouget, 2006; Mamassian,  
36 Landy, & Maloney, 2002; Trommershäuser, Maloney, & Landy, 2008). Humans have also been  
37 shown to near-optimally utilise knowledge about stimulus base rates to resolve stimulus ambiguity  
38 (Kersten, Mamassian, & Yuille, 2004; Körding & Wolpert, 2004; O'Reilly, Jbabdi, Rushworth, &  
39 Behrens, 2013; Sun & Perona, 1998; Vilares, Howard, Fernandes, Gottfried, & Kording, 2012).

40 On the other hand, psychologists and behavioural economists, studying more cognitive  
41 judgments, have argued that human choices are suboptimal (Tversky & Kahneman, 1974). For  
42 example, when required to guess a person's occupation, humans neglect the base rate of different  
43 professions and solely rely on the person's description provided by the experimenter. Such  
44 suboptimality has been attributed to insufficient past experience (Hertwig & Erev, 2009), limited  
45 stakes in laboratory settings (Levitt & List, 2007), the format in which problems are posed  
46 (Jarvstad, Hahn, Rushton, & Warren, 2013), distortions in representations of values and  
47 probabilities (Ackermann & Landy, 2014), and/or a reluctance to employ costly cognitive  
48 resources (Gershman, Horvitz, & Tenenbaum, 2015; Kahneman, 2011). However, an account of  
49 human decision-making that can explain both perceptual optimality and cognitive suboptimality  
50 has yet to emerge (Summerfield & Tsetsos, 2015).

51 Here we propose that resolving this apparent paradox requires recognizing that perceptual  
52 and cognitive choices often are corrupted by different sources of noise. More specifically, choices  
53 in perceptual and cognitive tasks tend to be corrupted by noise which arises at different stages of  
54 the information processing leading up to a choice (Faisal & Wolpert, 2009; Hunt, 2014; Juslin &  
55 Olsson, 1997; Ma & Jazayeri, 2014). In perceptual tasks, experimenters typically manipulate noise  
56 arising before or during sensory encoding. For example, they may vary the contrast of a grating,  
57 or the net motion energy in a random dot kinematogram, which affects the signal-to-noise ratio of  
58 the encoded stimulus and in turn the sensory percept. Conversely, in cognitive tasks, which often  
59 involve written materials or clearly perceptible stimuli, experimenters typically seek to manipulate  
60 noise arising after stimulus encoding. For example, they may vary the discrepancy between  
61 different pieces of information bearing on a choice, such as the relative costs and benefits of a  
62 consumer product (Kahneman, 2011). These types of judgment are difficult because they require  
63 integration of multiple, sometimes highly discordant, pieces of information within a limited-  
64 capacity system (Botvinick, Braver, Barch, Carter, & Cohen, 2001; Eriksen & Eriksen, 1974;  
65 MacLeod, 1991).

66 Here we test the hypothesis that, while humans are sensitive to noise arising during early  
67 sensory encoding, they are blind to the additional noise introduced by their own cognitive system  
68 when integrating variable or discordant pieces of information. We tested this hypothesis using a  
69 novel psychophysical paradigm which separates, within a single task, these two types of noise. In  
70 particular, observers were asked to categorise the average tilt of an array of gratings. We  
71 manipulated encoding noise (i.e. the perceptual difficulty of encoding an individual piece of  
72 information) by changing the contrast of the array of gratings, with decisions being harder for low-  
73 contrast arrays. Second, we manipulated integration noise (i.e. the cognitive difficulty of  
74 integrating multiple pieces of information) by changing the variability of the orientations of

75 individual gratings, with decisions being harder for high-variability arrays. Manipulating these  
76 different sources of noise within a single task allows us to rule out previous explanations of the  
77 optimality gap which hinge on task differences. To pre-empt our results, we show that, while  
78 observers adapt near-optimally to increases in encoding noise, they fail to adapt to increases in  
79 integration noise. We argue that such “noise blindness” is a major driver of suboptimal inference  
80 and may explain the gap in optimality between perceptual and cognitive judgments.

## 81 **Results**

### 82 Experimental dissociation of encoding noise and integration noise

83 All six experiments were based on the same psychophysical task (see Methods). On each  
84 trial, participants were presented with eight tilted gratings organized in a circular array.  
85 Participants were required to categorise the average orientation of the array as oriented clockwise  
86 (CW) or counter-clockwise (CCW) from the horizontal axis (**Fig. 1A-B**). After having made a  
87 response, participants received categorical feedback about choice accuracy, before continuing to  
88 the next trial. We manipulated two features of the stimulus array to dissociate encoding noise and  
89 integration noise: the *contrast* of the gratings (root mean square contrast, *rmc*: {0.15, 0.6}), which  
90 affects encoding noise, and the *variability* of the gratings’ orientations (standard deviation of  
91 orientations, *std*: {0°, 4°, 10°}), which affects integration noise. The distribution of average  
92 orientations was identical for all experimental conditions.

93 In Experiments 1 ( $n = 20$ ) and 2 ( $n = 20$ ), we assessed the effects of contrast and variability  
94 on choice accuracy and evaluated participants’ awareness of these effects. In both experiments, at  
95 the beginning of a trial, we provided a “prior” cue which, on half of the trials, signalled the correct  
96 stimulus category with 75% probability (henceforth “biased” trials), and, on the other half of trials,  
97 provided no information about the stimulus category (henceforth “neutral” trials) (**Fig. 1B**). The  
98 neutral trials provided us with a baseline measure of participants’ choice accuracy in the different  
99 conditions of our factorial design, and the biased trials allowed us to assess the degree to which –  
100 if at all – participants compensated for reduced choice accuracy in a given experimental condition  
101 by relying more on the prior cue. In Experiment 2, to provide additional insight into participants’  
102 awareness of their own performance, we also asked participants to report their confidence in the  
103 choice (i.e. the probability that a choice is correct; **Fig. 1C**).

### 104 Matched performance for different levels of encoding and integration noise

105 We first used the neutral trials to benchmark the effects of contrast and variability on choice  
106 accuracy. As intended, choice accuracy decreased with lower contrast (Exp1:  $F(1,19) = 15.54$ ,  $p$   
107  $< .001$ ; Exp2:  $F(1,19) = 41.08$ ,  $p < .001$ ; collapsed:  $F(1,39) = 49.3$ ,  $p < .001$ ) and with higher  
108 variability (Exp1:  $F(1.3,24.7) = 8.51$ ,  $p < .001$ ; Exp2:  $F(1.6,32.2) = 26.0$ ,  $p < .001$ ; collapsed:  
109  $F(1.4,57.3) = 30.61$ ,  $p < .001$ ). Our factorial design contained three critical conditions which  
110 allowed us to compare participants’ behaviour under distinct sources of noise: (i) “baseline”, (ii)  
111 “low-c” and (iii) “high-v”. In the baseline condition, the total amount of noise is lowest (high  
112 contrast, .6; zero variability, 0°). In the low-c condition (low contrast, .15; zero variability, 0°),  
113 encoding noise is high but integration noise is low. Conversely, in the high-v condition, integration  
114 noise is high but encoding noise is low (high contrast, 0.6; high variability, 10°). As expected,  
115 choice accuracy was reduced both in the low-c and in the high-v conditions (about 12%) compared  
116 to the baseline condition (baseline>low-c:  $t(39) = 9.24$ ,  $p < .001$ ; baseline>high-v:  $t(39) = 9.70$ ,  $p$

117 < .001; **Fig. 2A**). Critically, choice accuracy was at statistically similar levels in the low-c and the  
 118 high-v conditions (Exp1, high-v>low-c:  $t(19) = 0.36, p > 0.7$ ; Exp2, high-v>low-c:  $t(19) = 0.11, p$   
 119  $> 0.9$ ; collapsed, high-v>low-c:  $t(39) = 0.34, p > 0.7$ ; **Fig. 2A**). Overall, the results show that we  
 120 successfully manipulated noise at different stages of information processing.

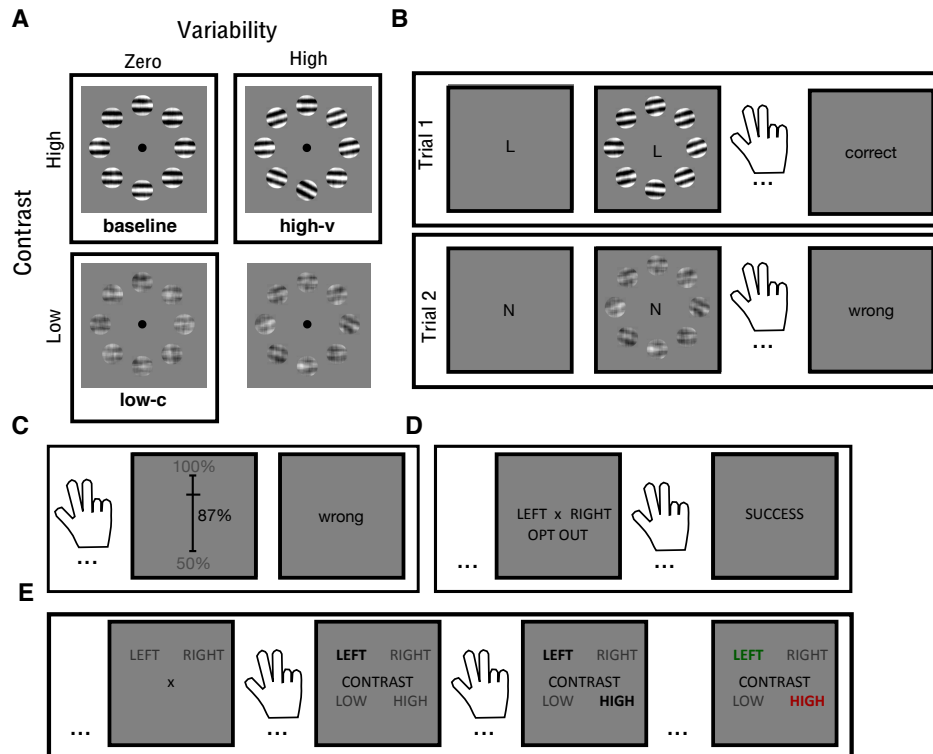

121  
 122 **Fig. 1. Experimental paradigm.** (A) We manipulated the stimulus contrast and the orientation variability  
 123 of an array of eight gratings in a factorial manner. Here we highlight the three critical conditions. (B)  
 124 Participants categorized the average orientation of the array as clockwise (CW, “left”) or counter-clockwise  
 125 (CCW, “right”) relative to horizontal. A cue, which was shown at the start of each trial and remained on  
 126 the screen until a response had been made, indicated the prior probability of occurrence of each stimulus  
 127 category (L: 25% CW, 75% CCW; N: 50% CW, 50% CCW; R: 75% CW, 25% CCW). Participants received  
 128 categorical feedback about choice accuracy, before continuing to the next trial. Feedback was based on the  
 129 average orientation of the displayed array. (C) In Experiment 2, after having made a choice, participants  
 130 estimated the probability that the choice was correct by sliding a marker along a scale (50% to 100% in  
 131 increments of 1%). (D) In Experiment 3, participants could opt out of making a choice and receive “correct”  
 132 feedback with a 75% probability. (E) In Experiment 4, after having made a choice, participants were  
 133 required to categorise (low versus high) either the contrast or the variability of the stimulus array. Here we  
 134 show a “contrast” trial.

135 *Do people utilise the prior cue to compensate for increased errors?*

136 We next leveraged the biased trials to assess the degree to which participants adapted to  
 137 the changes in choice accuracy induced by our factorial design. Given the above results, we would  
 138 expect participants to rely more on the prior cue in the low-c and the high-v condition than in the  
 139 baseline condition. To test this prediction, we applied Signal Detection Theory (Macmillan &  
 140 Creelman, 2004; Stanislaw & Todorov, 1999) to quantify the degree to which participants shifted  
 141 their decision criterion in accordance with the prior cue (see Methods). Briefly, we constructed a

142 “bias index” computed as the difference in the decision criteria between the condition in which the  
 143 prior cue was “clockwise” and the condition in which the prior cue was “counter-clockwise”. The  
 144 higher the bias index, the higher the influence of the prior cue on choice. As expected under an  
 145 ideal observer framework, participants used the prior cue more in the low-c than in the baseline  
 146 condition ( $t(39) = 4.89, p < .001$ ; **Fig. 2C**). However, contrary to an ideal observer framework,  
 147 participants used the prior cue less in the high-v than in the baseline condition ( $t(39) = 2.85, p <$   
 148  $.01$ ; **Fig. 2C**). This pattern is clear from the psychometric curves constructed separately for each  
 149 condition shown in **Fig. 2B** (compare inflection points).

150 In line with these results, a full factorial analysis of the bias index identified a positive main  
 151 effect of contrast ( $F(1,39) = 24.02, p < .001$ ) and a negative main effect of variability ( $F(1,9,37.1)$   
 152  $= 9.9, p < .001$ ; **Fig. 2D**). Finally, including both neutral and biased trials, we used trial-by-trial  
 153 logistic regression to investigate how contrast (c) and variability (v) affected the influence of the  
 154 prior cue and sensory evidence ( $\mu\theta$ ) on choices ( $\mu\theta, \text{cue}, \mu\theta*c, \mu\theta*v, \text{cue}*c, \text{cue}*v$ ; **Fig. 2E**). The  
 155 prior cue had a larger influence on choices on low-contrast compared to high-contrast trials ( $t(39)$   
 156  $= 4.05, p < .001$ ) and on low-variability compared to high-variability trials ( $t(39) = 5.21, p <$   
 157  $.001$ ). Taken together, these results show that participants did not adapt to the additional noise arising  
 158 during integration of discordant pieces of information.

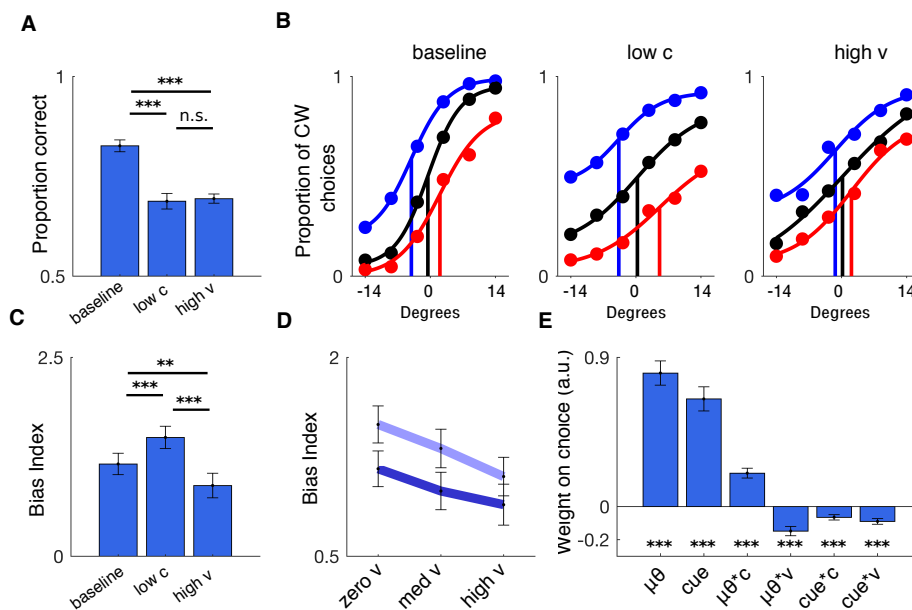

159  
 160 **Fig. 2. Effects of contrast and variability on choice behaviour.** (A) Choice accuracy for the baseline,  
 161 reduced contrast (low-c) and increased variability (high-v) conditions. (B) Psychometric curves are  
 162 shallower in the low-c and high-v conditions compared to baseline. The x-axis indicates average orientation  
 163 relative to horizontal, with negative and positive values for CCW and CW, respectively. Choices shift  
 164 towards the cued category on biased trials (blue: 75% CW; red: 25% CW) compared to neutral trials (black)  
 165 but least so in the high-v condition. Vertical lines mark the inflection points of psychometric functions fitted  
 166 to the average data. Psychometric curves were created for illustration. (C) Bias index, a measure of cue  
 167 usage, is higher in the low-c condition but lower in the high-v condition compared to baseline. (D) Factorial  
 168 analysis of the effects of contrast and variability on the bias index shows an increase with contrast (dark  
 169 blue: high contrast; pale blue: low contrast) but a decrease with variability. (E) Trial-by-trial influence of  
 170 prior cue on choices measured using logistic regression. c: contrast; v: variability;  $\mu\theta$ : signed mean  
 171 orientation; cue: signed prior cue. (A-E) Data is represented as group mean  $\pm$  SEM. \*  $p < .05$ , \*\*  $p < .01$ ,

172 \*\*\*  $p < .001$ . For panel A, only neutral trials were used. For panel B and E, both neutral and biased trials  
 173 were used. For panels C and D, only biased trials were used.

174 Are people blind to integration noise?

175 To test whether participants failed to adapt because they were “blind” to integration noise,  
 176 we analysed the confidence reports elicited in Experiment 2 (**Fig. 1C**). We implemented a strictly-  
 177 proper scoring rule such that it was in participants’ best interest (i) to make as many accurate  
 178 choices as possible and (ii) to estimate the probability that a choice is correct as accurately as  
 179 possible (Sonnemans & Theo Offerman, 2001). In support of our hypothesis, analysis of the full  
 180 factorial design showed that, while confidence varied with contrast ( $F(1,19) = 32.97, p < .001$ ), it  
 181 did not vary with variability ( $F(1.2,22.5) = 0.73, p > 0.4$ ). In addition, direct comparison between  
 182 the low-c and high-v conditions showed that participants were more confident in the high-v  
 183 condition ( $t(19) = 3.98, p < .001$ ; **Fig. 3A**), with participants overestimating their performance  
 184 (difference between mean confidence and mean accuracy;  $t(19) = 2.66, p < .05$ ; **Fig. 3A**). Although  
 185 participants reported lower confidence in the high-v condition compared to baseline (**Fig. 3A**), this  
 186 decrease was due to participants utilising response times as a cue to confidence (Zakay & Tuvia,  
 187 1998): a trial-by-trial regression analysis showed that confidence decreased with longer response  
 188 times (RTs) and was unaffected by variability once RTs had been accounted for ( $v: t(19) = 0.38,$   
 189  $p > 0.7$ ; all other  $t$ -values  $> 4$ , all  $p < .001$ ; see **Fig. 3B** and *Response times* in the Supplementary  
 190 Information). Overall, these results show that participants were overconfident under integration  
 191 noise, as if they were “blind” to the impact of integration noise on their performance.

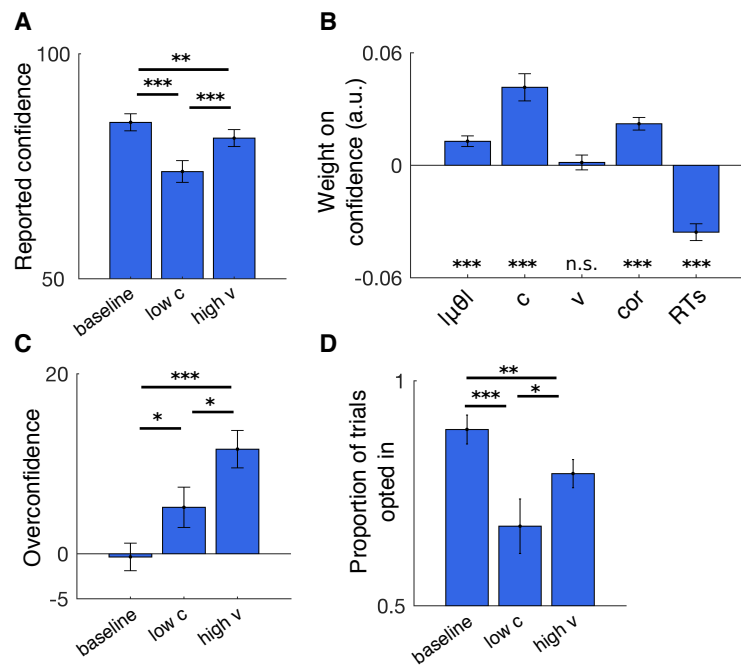

192  
 193 **Fig. 3. Effects of contrast and variability on explicit and implicit markers of confidence.** (A) Mean  
 194 confidence in the baseline, reduced contrast (low-c) and increased variability (high-v) conditions. (B) Trial-  
 195 by-trial confidence is not influenced by variability (v) but is influenced by the deviation of the average  
 196 orientation from horizontal ( $|\mu\theta|$ ), contrast (c), choice accuracy (cor) included in order to account for error  
 197 detection (Yeung & Summerfield, 2012), and response times (RTs). (C) Overconfidence, the difference

198 between mean confidence and mean choice accuracy, is highest in the high-*v* condition. **(D)** Higher  
199 probability of making a choice (and thus not opting out) in the high-*v* condition compared to the low-*c*  
200 condition. **(A-D)** Data are represented as group mean  $\pm$  SEM. For panel B, only biased trials were used. For  
201 all other panels, only neutral trials were used.

202 In Experiment 3 ( $n = 18$ ), because explicit confidence reports can be highly idiosyncratic  
203 (Aitchison, Bang, Bahrami, & Latham, 2015; Bang et al., 2017), we obtained an implicit, but  
204 perhaps more direct measure, of confidence (Hampton, 2001; Kepecs & Mainen, 2012; Kiani &  
205 Shadlen, 2009). Specifically, on half of the trials (“optional trials”), we introduced an additional  
206 choice option, an opt-out option, which yielded “correct” feedback with a 75% probability. On the  
207 other half of trials (“forced trials”), participants had to make an orientation judgment. Under this  
208 design, to maximise reward, participants should choose the opt-out option whenever they thought  
209 they were less than 75% likely to make a correct choice. Despite matched levels of choice accuracy  
210 in the low-*c* and the high-*v* conditions (forced trials,  $t(17) = 0.24$ ,  $p > 0.8$ ), participants decided to  
211 make an orientation judgment more often on high-*v* than on low-*c* trials (optional trials,  $t(17) =$   
212  $2.32$ ,  $p < .05$ ; **Fig. 3D**), again indicating overconfidence in the face of integration noise. A full  
213 factorial analysis verified that the proportion of such opt-in trials varied with contrast ( $F(1,17) =$   
214  $21.2$ ,  $p < .001$ ) but not with variability ( $F(1.4,23.9) = 3.6$ ,  $p > 0.05$ ). Similarly, a trial-by-trial  
215 logistic regression showed that the probability of opting in varied with contrast ( $t(17) = 6.93$ ,  $p <$   
216  $.001$ ) but not with variability ( $t(17) = 1.6$ ,  $p > 0.1$ ), after controlling for other task-relevant factors  
217 (e.g., average orientation and RTs). In sum, participants opted out more often when encoding noise  
218 was high, but did not do so when integration noise was high, despite making a comparable  
219 proportion of errors in the two conditions.

### 220 Computational model of noise blindness

221 We next compared a set of computational models based on the ideal observer framework  
222 to provide a mechanistic explanation for the observed data (see Methods). There are broadly three  
223 components to our modelling approach. First, a generative (true) model which describes the task  
224 structure and the generation of noisy sensory data. Second, an agent’s internal model of the task  
225 structure and how sensory data is generated; the internal model may differ from the generative  
226 model. Finally, a Bayesian inference process which involves inverting the internal model in order  
227 to estimate the probability of a stimulus category given sensory data and generate a response. This  
228 inference process involves marginalising over contrast and variability levels according to a belief  
229 distribution over experimental conditions. Optimal behaviour can be said to occur when there is a  
230 direct correspondence between the generative model and the agent’s internal model. We evaluated  
231 the models both qualitatively (i.e. model predictions for critical experimental conditions) and  
232 quantitatively (i.e. BIC scores).

233 We focus on an “omniscient” model, which has perfect knowledge of the task structure and  
234 how sensory data is generated, and two suboptimal models which propose different mechanistic  
235 explanations of participants’ lack of sensitivity to the performance cost associated with stimulus  
236 variability. The suboptimal models relax the *omniscient* assumptions about an agent’s beliefs about  
237 (i) the task structure and/or (ii) the sources of noise in play. See Supplementary Information for  
238 details about all models considered.

239 In our task the average orientation of a stimulus array was sampled from a common  
240 distribution of orientations across experimental conditions (**Fig. 4A**). We modelled an agent’s  
241 sensory data as a random (noisy) sample from a Gaussian distribution centred on the average



242 orientation of the stimulus array (**Fig. 4B**), with the variance of this distribution determined by  
 243 both encoding noise and integration noise. We used each participant's data from the neutral trials  
 244 to parameterise their levels of encoding noise and integration noise in each experimental condition  
 245 (see Methods). The fitted noise levels, which are part of the generative model, were the same for  
 246 all models; thus no additional free parameters were fitted to the data and the models only differed  
 247 with respect to their assumptions about the internal model used for Bayesian inference.

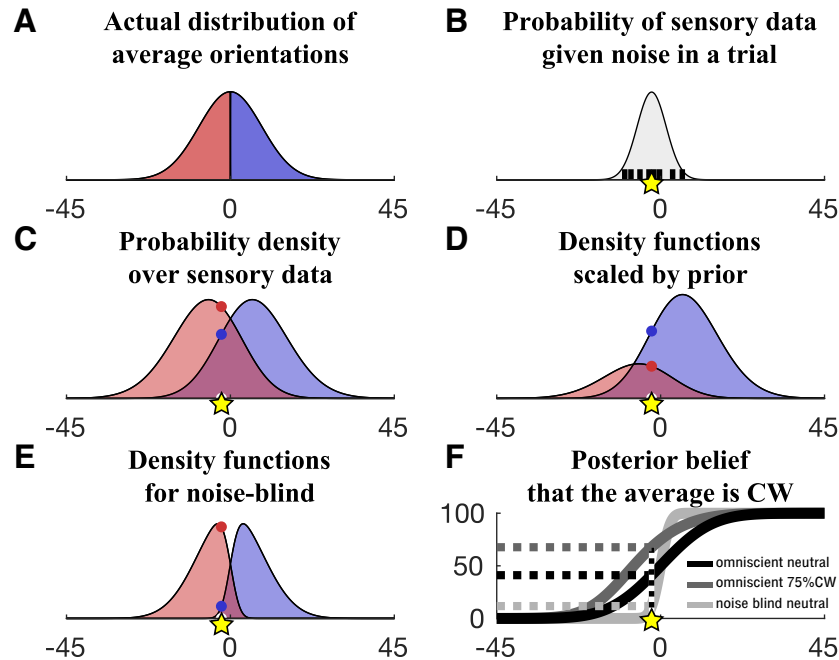

248  
 249 **Fig. 4. Computational model.** (A) Distribution of average orientations conditioned on CCW (red)  
 250 and CW (blue). (B) An agent's sensory data was modelled as a sample from a Gaussian distribution centred  
 251 on the average orientation of the eight gratings in a stimulus array (black vertical lines), with the variance  
 252 of this distribution determined by both encoding noise and integration noise. The yellow star marks the  
 253 sensory data for an example trial. (C) An omniscient agent has a pair of category-conditioned probability  
 254 density functions over sensory data for each experimental condition (i.e. contrast  $\times$  variability level; here a  
 255 single condition is shown). The agent uses the relevant pair of density functions to compute the probability  
 256 of the observed sensory data (yellow star) given each category (red and blue dots). Note that, for an  
 257 omniscient agent, these density functions match the true probability density over sensory data under the  
 258 generative model. See an example of a full set of density functions for an experiment in **Fig. S1**. (D) Density  
 259 functions from panel C after scaling by the prior cue (here 75% CW). The sensory data (yellow star) is now  
 260 more likely to have come from a CW stimulus than a CCW stimulus. (E) The noise-blind model only takes  
 261 into account encoding noise: the density functions therefore overlap less than in panel C and they do not  
 262 match the true probability density over sensory data. (F) Posterior belief that the stimulus is CW as a  
 263 function of the same sensory data (yellow star) for the examples shown in panels C (black, omniscient  
 264 model on neutral trials), D (dark grey, omniscient model when prior cue is 75% CW) and E (light grey,  
 265 noise-blind model on neutral trials). Steeper curves indicate higher confidence; categorisation accuracy (on  
 266 neutral trials) is the same for all models. The variability-mixer curve would have intermediate slope  
 267 between that of the omniscient and the noise blind model in conditions of high variability.

268 The *omniscient* model has, for each experimental condition, a pair of functions that specify  
 269 the probability density over sensory data given a CW and a CCW stimulus, taking into account  
 270 both encoding and integration noise. As the model can identify the current condition (e.g., knows

271 with certainty that a trial is drawn from the high-contrast, high-variability condition), it only uses  
 272 the relevant pair of density functions to compute the probability of the observed sensory data given  
 273 a CCW and a CW category (**Fig. 4C**). On neutral trials, each category is equally likely, and the  
 274 agent computes the probability that a stimulus is CW and CCW directly from the density functions.  
 275 On biased trials, the categories have different prior probabilities, and the agent scales the density  
 276 functions by the prior probability of each category as indicated by the prior cue (**Fig. 4D**). After  
 277 having calculated the probability that a stimulus is CW and CCW, the agent can compute a choice  
 278 (i.e. chose the category with the higher posterior probability) and confidence in this choice (i.e.  
 279 the probability that the choice is correct)

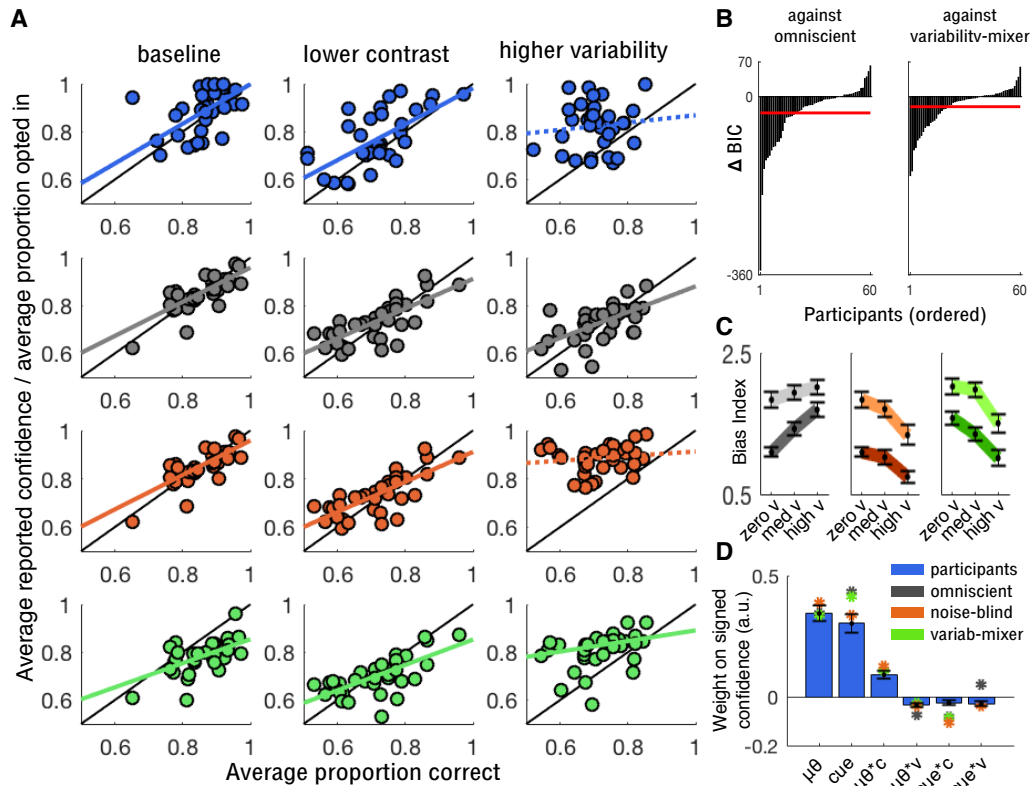

280

281 **Fig. 5. Comparison of model and human behaviour.** (A) Correspondence between mean accuracy and  
 282 mean confidence (explicit estimates or proportion of opt-in responses) for participants (blue, data from  
 283 Exp1-3) and the omniscient (grey), noise-blind (orange) and variability-mixer (green) models in the critical  
 284 experimental conditions. Coloured lines indicate best-fitting slope of a linear regression analysis: solid for  
 285  $p < .05$ , dotted for  $p > 0.4$ . (B) Model comparison (Exp1-3) suggests strong evidence in favour of the noise-  
 286 blind model over the omniscient model (left panel, average  $\Delta BIC = -32.9$ ) and also over the variability-  
 287 mixer model (right panel,  $\Delta BIC = -20.4$ ). (C) Omniscient model (left) makes opposite predictions to noise-  
 288 blind model (middle) and variability-mixer model (right) for the influence of the prior cue on choice (Exp1-  
 289 2) as variability increases (positive versus negative slopes) but similar predictions as contrast decreases  
 290 (lighter lines above darker ones). Dark colours: high contrast. Light colours: low contrast. (D) Trial-by-  
 291 trial analysis of signed confidence (Exp2; negative for CCW and positive for CW) for participants (blue)  
 292 and the omniscient (grey), noise-blind (orange) and variability-mixer (green) models. (C-D). Data are  
 293 represented as group mean  $\pm$  SEM. For panel A, only neutral and optional trials were used. For panels B  
 294 and C, only biased trials were used. For panel D, both neutral and biased trials were used. Within-model  
 295 variability in predictions comes from variability in encoding and integration noise across participants.

296 We now consider two competing explanations of the participants' lack of sensitivity to the  
297 performance cost associated with stimulus variability. First, a *variability-mixer* model which  
298 relaxes the assumption that an agent can identify the current variability condition. The model  
299 therefore uses a single pair of density functions for all variability conditions (which are a mixture  
300 of density functions across variability levels). As a result, compared to the *omniscient* model, the  
301 density functions are wider on low-variability trials but narrower on high-variability trials. Second,  
302 a *noise-blind* model which relaxes the assumption that the agent is aware of integration noise. As  
303 for the variability-mixer model, the noise-blind model uses a single pair of density functions for  
304 all variability conditions, but, critically, these density functions do not take into account the  
305 additional noise induced by stimulus variability. Because of these differences in the internal model  
306 used for Bayesian inference, the models differ in the degree of confidence in a choice for a given  
307 sensory data (**Fig. 4F**) and, by extension, the influence of the prior cue on choice on biased trials.

308 In support of our hypothesis, the noise-blind model provided the best fit to our data. First, the  
309 noise-blind model, and not the omniscient model, predicted three key features of participants'  
310 behaviour: (i) overconfidence on high-variability trials within participants (**Fig. S2**), (ii) no  
311 correlation between mean accuracy and mean confidence across participants (**Fig. 5A**) and (iii) a  
312 diminished influence of the prior cue on high-variability trials, as seen by both the analysis of the  
313 bias index (**Fig. 5C**) and the trial-by-trial regression predicting confidence (**Fig. 5D**), where the  
314 prior cue has a positive effect on confidence but its effect decreases with high contrast and high  
315 variability (in line with noise blindness). In addition, quantitative comparison yielded "very strong  
316 evidence" (Kass & Raftery, 1995) for the noise-blind model over the omniscient model, with an  
317 average  $\Delta\text{BIC}$  across participants of -32.9 (**Fig. 5B**). Similarly, analyses of the patterns of  
318 overconfidence in the critical conditions of our factorial design favoured the noise-blind over the  
319 variability-mixer model (**Fig. S2**), and quantitative comparison yielded "very strong evidence" for  
320 the noise-blind over the variability-mixer model ( $\Delta\text{BIC} = -20.4$ , **Fig. 5B**). In sum, the modelling  
321 indicates that participants neglected integration noise altogether.

### 322 Participants are noise blind and not variability blind

323 To further rule out the hypothesis that participants were simply unable to discriminate the  
324 variability conditions as proposed by the variability-mixer model, we ran Experiment 4 ( $n = 24$ ).  
325 After having made a choice, participants were asked to categorise either the contrast of the stimulus  
326 array (*rmc*, high: .6 vs. low: .15) or the variability of the stimulus array (*std*, high:  $10^\circ$  vs. low:  $0^\circ$ )  
327 (**Fig. 1E**). Again, choice accuracy on neutral trials in the low-c and the high-v conditions was  
328 statistically indistinguishable ( $t(23) = 1.16, p > 0.2$ ). We reasoned that, if participants had difficulty  
329 identifying the variability condition but otherwise aware of integration noise, then they should  
330 behave closer to optimal when they correctly identified the variability condition. To test this  
331 prediction, we used the biased trials to compare cue usage when the variability condition was  
332 correct and incorrectly categorised (75.71%  $\pm$  2.26% of the variability-condition judgments were  
333 correct). In contrast to the prediction, but in line with our hypothesis, participants showed blindness  
334 to integration noise even when they correctly identified the variability condition: participants were  
335 more biased on low-c than high-v trials regardless of whether the variability categorisation was  
336 correct ( $t(23) = 3.21, p < .01$ ) or incorrect ( $t(23) = 4.05, p < .001$ ; **Fig. 6A-B**).

337 In Experiments 1-4, the experimental conditions were interleaved across trials, which may  
338 have made it too difficult for participants to separate the different sources of noise in play. To test  
339 the generality of our results, we ran Experiment 5 ( $n = 24$ ) in which either the contrast or variability

340 level were kept constant across a block of trials (**Fig. 6C-D**). Even then, and despite receiving trial-  
 341 by-trial feedback, participants were not, compared to the baseline condition, more influenced by  
 342 the prior cue when variability was high (biased trials,  $t(23) = 0.32, p > 0.7$ ), but they were when  
 343 contrast was low (biased trials,  $t(23) = 3.31, p < .01$ ). In other words, even under blocked  
 344 conditions participants failed to learn about the performance cost associated with stimulus  
 345 variability.

346

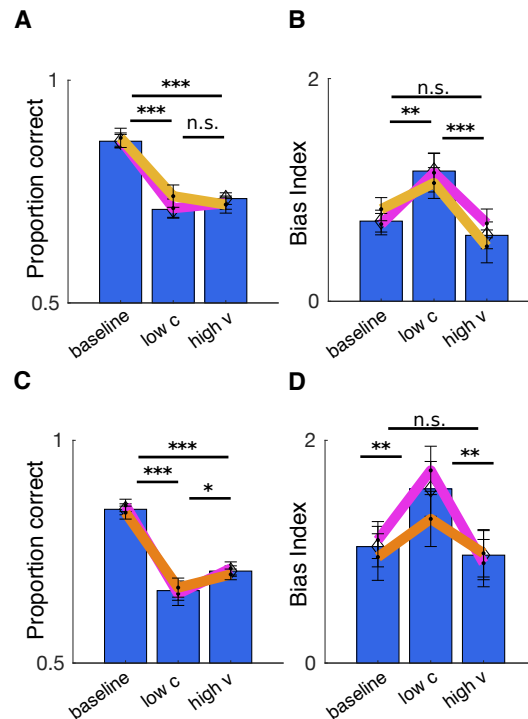

347

348 **Fig. 6. Experimental evidence against variability mixing.** (A) Choice accuracy for the baseline,  
 349 reduced contrast (low-c) and increased variability (high-v) conditions for Experiment 4. (B) In Experiment  
 350 4, the influence of the prior cue is highest when encoding noise is high (low-c) and lowest when integration  
 351 noise is high (high-v). (C) Same as panel A, but for Experiment 5. (D) Same as panel B, but for Experiment  
 352 5. (A-B) Coloured lines indicate trials where the categorisation of contrast was correct (pink) and where  
 353 the categorisation of variability was correct (yellow). (C-D) Coloured lines indicate trials where the contrast  
 354 level was blocked (pink) or when the variability level was blocked (brown). We note that the difference in  
 355 bias index for the low-c condition between contrast blocking and variability blocking can be explained by  
 356 a general shift in the bias index according to block difficulty: when contrast is blocked, the low-c condition  
 357 is accompanied by the hardest condition (the condition with low contrast and high variability), but when  
 358 variability is blocked, the low-c condition is accompanied by the easiest condition (the condition with high  
 359 contrast and zero variability). (A-D) Data are represented as group mean  $\pm$  SEM. For panels A and C,  
 360 neutral trials were used. For panels B and D, biased trials were used.

### 361 Sequential sampling account of noise blindness

362 A recent study investigated how stimulus volatility (i.e. changes in evidence intensity  
 363 across a trial) affected choice and confidence (Zylberberg, Fetsch, & Shadlen, 2016). Participants  
 364 were found to make faster responses and report higher confidence when stimulus volatility was

365 high. These results were explained by a sequential sampling model which assumes that observers  
366 are unaware of stimulus volatility and therefore, unlike an “omniscient” model, adopt a common  
367 choice threshold across trial types. In the Supplementary Information, we show, using empirical  
368 and computational analyses, that this model cannot explain our results (**Fig. S3**). For example, the  
369 model predicts *faster* RTs on high-variability than low-variability trials, a prediction which is at  
370 odds with our observation of *slower* RTs on high-variability trials.

### 371 Noise blindness cannot be explained by subsampling

372 We have proposed that stimulus variability impairs performance because of noise inherent  
373 to cognitive integration of variable or discordant pieces of information. An alternative explanation  
374 of the performance cost for high stimulus variability is that participants based their responses on a  
375 subset of gratings rather than the full array. Under this *subsampling* account, choice accuracy for  
376 high-variability stimuli is lower because of a larger mismatch between the average orientation of  
377 the full array and the average orientation of the sampled subset. Here we provide several lines of  
378 evidence against the subsampling account (see details in Supplementary Information).

379 We first examined performance under different set-sizes in Experiment 6 ( $n = 20$ ) where  
380 the stimulus array was made up of either four or eight gratings (average orientations and orientation  
381 variability were equated across set-sizes). We reasoned that, if participants did indeed engage in  
382 subsampling, then performance should be higher for four than eight gratings. Because of the  
383 matched average tilt in the array, sampling four items would impair performance in the high-v  
384 condition for an eight-item array but not for a four-item array. However, we found no effect of set-  
385 size on choice accuracy ( $F(1,20) = 0.006$ ,  $p > 0.9$ ; **Fig. S4A**); the effects of contrast ( $F(1,20) =$   
386  $40.9$ ,  $p < .001$ ) and variability ( $F(1,20) = 30.50$ ,  $p < .001$ ) were comparable to those observed in  
387 our previous experiments.

388 We next simulated performance for eight-grating arrays under a subsampling agent which  
389 did not have integration noise but instead sampled a subset of the items (1-8 items, **Fig. S4B**). The  
390 observed difference in participants’ performance between the baseline and the high-v conditions  
391 could be explained by assuming an agent that sampled about four items out of eight. However, this  
392 account – because there is no integration noise – predicts that participants should have similar  
393 levels of performance for the baseline and the high-v conditions for four-item arrays, a prediction  
394 which is at odds with our data (**Fig. S4A**). If integration noise is introduced, then most, if not all,  
395 items would have to be sampled to account for the data.

396 Finally, we fitted a computational model to participants’ choices in Experiments 1 to 3  
397 (eight-item arrays) in order to directly estimate the number of items sampled by each participant.  
398 This modelling approach revealed that the majority participants (42 out of 60) sampled all eight  
399 items (Table S2). We note that subsampling, even if an auxiliary cause of integration noise, cannot  
400 without further assumptions (e.g. blindness to the performance cost) explain participants’ lack of  
401 sensitivity to the performance cost associated with high-variability stimuli.

## 402 **Discussion**

403 Here we propose a new explanation for the previously reported gap in optimality between  
404 perceptual and cognitive decisions. Using a novel paradigm, we show, within a single task, that  
405 humans are sensitive to noise present during sensory encoding, in keeping with previous perceptual  
406 studies (Ernst & Banks, 2002; Körding & Wolpert, 2004), but blind to noise arising when having  
407 to integrate variable or discordant pieces of information, a typical requirement in cognitive tasks.

408 This noise blindness gave rise to two common signatures of suboptimality often found in cognitive  
409 studies: base-rate neglect and overconfidence.

410 We provided several lines of evidence for our hypothesis. When stimulus variability was  
411 high, participants were overconfident, as indicated by cue usage, subjective confidence reports as  
412 well as opt-in responses, even though they received trial-by-trial feedback, and even when stimulus  
413 variability was salient (Exp1-3), accurately categorised (Exp4) or constant across a block of trials  
414 (Exp5). These findings indicate that, while participants were able to track stimulus variability, they  
415 simply neglected the performance cost associated with high-variability stimuli. We also ruled out  
416 that such noise blindness was due to participants only sampling a subset of a stimulus array (Exp6).  
417 The best model of our data assumed that participants sampled all items and were blind to the  
418 additional noise inherent to cognitive integration of variable or discordant pieces of information.

419 An extensive literature has considered the different types of noise which affect human  
420 choices (Beck, Ma, Pitkow, Latham, & Pouget, 2012; Hunt, 2014; Juslin & Olsson, 1997). Our  
421 classification is partially related to a previous distinction between noise which originates inside  
422 the brain, such as intrinsic stochasticity in sensory transduction (Thurstone, 1927), and noise which  
423 arises outside the brain, such as a probabilistic relationship between a cue and a reward (Brunswik,  
424 1956). Specifically, our account classifies noise according to when it arises during the information  
425 processing that precedes a choice. Encoding noise refers to noise accumulated up to the point at  
426 which a stimulus is encoded. As such, encoding noise includes both “external” noise (e.g., a weak  
427 correspondence between a retinal image in dim lighting and the object that caused the image) and  
428 “internal” noise (e.g., intrinsic stochasticity in sensory transduction). In comparison, integration  
429 noise strictly refers to internal noise which arises at later stages of information processing, such as  
430 when integrating variable or discordant pieces of information within a limited-capacity system.  
431 Under our account, any task that requires the combination of multiple pieces of evidence will be  
432 subject to integration noise, and the amount of integration noise will scale with the variability of  
433 the different pieces of information that must be combined. Choices may of course be affected by  
434 other types of noise than those considered here. For example, cognitive decisions may involve  
435 memories, sometimes distant in the past, and risk and ambiguity (Bach & Dolan, 2012; Payzan-  
436 LeNestour & Bossaerts, 2011).

437 Many psychophysical tasks confound encoding and integration noise. For instance, in a  
438 random dot-motion task, increasing motion coherence simultaneously increases encoding noise  
439 (as instantaneous evidence is less indicative of the correct category of motion) and integration  
440 noise (as the variability of evidence across time is higher and thus harder to integrate). Recent  
441 work has shown that noisy cognitive inference, related to our notion of integration noise, is a major  
442 driver of variability in choices (Drugowitsch, Wyart, Devauchelle, & Koechlin, 2016). Similarly,  
443 it has been shown that for complex inference problems, a mismatch between an agent’s internal  
444 model of a task and the true structure of a task provokes departures from optimality (Beck et al.,  
445 2012). Here we extend these findings by introducing noise blindness as an additional driver of  
446 suboptimal cognitive inference. Specifically, the variability in choices caused by integration noise,  
447 or by imperfect inference, may not systematically bias choices away from the true choice.  
448 Blindness to these sources of choice variability, however, predicts systematic overconfidence,  
449 which may manifest itself as a lack of sensitivity to base-rate information, for example. In short,  
450 suboptimality can arise not only from having the “wrong” model of the task but also from having  
451 the “wrong” model of oneself.

452           We do not know why humans are blind to integration noise. One possibility is that basing  
453 decision strategies on all sources of noise would prolong deliberation and thus reduce reward rates,  
454 or that recognising one's own cognitive deficiencies requires a much longer timeframe. However,  
455 a well-known cognitive illusion may help understand why blindness to one's own cognitive  
456 deficiencies may not be catastrophic: even though failures to detect salient visual change suggests  
457 that cognitive processing is highly limited (Simons & Levin, 1997), humans enjoy rich, vivid  
458 visual experiences of cluttered natural scenes. Human information processing is sharply limited  
459 by capacity, but as agents we may not be fully aware of the extent of these limitation.  
460

461 **Acknowledgments**

462 This work was supported by a Wellcome 4-year-PhD grant to S.H.C. (0099741/Z/12/Z)  
463 and an ERC starter grant to C.S. (281628). The Wellcome Centre for Human Neuroimaging is  
464 supported by core funding from Wellcome (203147/Z/16/Z).

465 **Author contributions**

466 S.H.C., D.B., T.E. and C.S. conceived the study. S.H.C., D.B., J.D. and C.S. designed the  
467 experiments. S.H.C. programmed the experiments. S.H.C, D.B. and J.D. performed the  
468 experiments. S.H.C., D.B. and R.M. developed the models. S.H.C. and D.B. analysed the data and  
469 performed the simulations. S.H.C., D.B., J.D., T.E. and C.S. interpreted the results. S.H.C. drafted  
470 the manuscript. S.H.C, D.B. and C.S. wrote the manuscript.

471 **Competing interests**

472 The authors declare no financial or non-financial competing interests.



## 473 **Methods**

### 474 *Participants*

475 One hundred and five healthy human participants with normal or corrected-to-normal  
476 vision were recruited to participate in six experiments (72 females, 8 left-handed, mean age  $\pm$  SD:  
477  $25.02 \pm 4.25$ ; Exp1:  $n = 20$ ; Exp2:  $n = 20$ ; Exp3:  $n = 20$ ; Exp4:  $n = 24$ ; Exp5:  $n = 24$ ; Exp6:  $n =$   
478  $20$ ). Participants were reimbursed for their time and could earn an additional performance-based  
479 bonus (see below). All participants provided written informed consent. The experiments were  
480 conducted in accordance with local ethical guidelines.

481

### 482 *Experimental paradigm*

483 All six experiments were based on the same psychophysical task. On each trial, participants  
484 had to judge whether the average orientation of a circular array of gratings (Gabor patches; see  
485 **Fig. 1**) was tilted clockwise (CW) or counter-clockwise (CCW) relative to horizontal. The average  
486 orientation of the gratings in each trial was randomly selected from a mixture of two Gaussian  
487 distributions (centred at  $3^\circ$  either side of the horizontal axis, respectively, and with  $8^\circ$  of standard  
488 deviation). We manipulated encoding noise and integration noise by varying two features of the  
489 array in a factorial way manner: the root mean square contrast (*rmc*) of the individual gratings,  
490 which affects the difficulty of encoding the stimulus array, and the variability of the orientations  
491 of the individual gratings (*std*), which affects the difficulty of integrating orientations across the  
492 stimulus array. The number of contrast and variability conditions varied between experiments: in  
493 Experiments 1-3, three contrast levels ( $rmc = \{0, .16, .6\}$ ) and three variability levels ( $std = \{0^\circ,$   
494  $4^\circ, 10^\circ\}$ ); in Experiments 4-6, two contrast levels ( $rmc = \{.15, .6\}$ ) and two variability levels ( $std$   
495  $= \{0^\circ, 10^\circ\}$ ). The stimulus array was presented for 150 ms and was followed by a 3000 ms choice  
496 period. Participants indicated their choice by pressing the right (CW) or the left (CCW) arrow-key  
497 on a QWERTY keyboard. They received feedback about choice accuracy, before continuing to the  
498 next trial. If no response was registered within the choice period, the word “LATE” appeared at  
499 the centre of the screen, and the next trial was started. Experiments 1, 2 and 3 consisted of 1296  
500 trials, divided into 36 blocks of 36 trials each. Experiments 4, 5 and 6 consisted of 1200 trials,  
501 divided into 32 blocks of 40 trials each.

502 In Experiments 1 and 2, participants were presented with a cue to the prior probability of  
503 each stimulus category. The cue was presented 700 ms before the onset of the stimulus array and  
504 remained on the screen until a response was registered. An “N” indicated that the two stimulus  
505 categories were equally likely, an “R” indicated a 75% probability of a CW stimulus and an “L”  
506 indicated a 75% probability of a CCW stimulus. Half of the blocks contained neutral trials (“N”)  
507 and the other half contained biased trials (“R” or “L”). The blocks were randomised across an  
508 experiment. In Experiment 2, after having made a choice, participants were required to indicate  
509 the probability that the choice is correct by moving a sliding marker along a scale (50% to 100%  
510 in increments of 1%). In Experiment 3, on half of the blocks, participants could opt out of making  
511 a choice and receive the same reward as for a correct choice with a 75% probability. There was no  
512 prior cue. In Experiment 4, after having made a choice, participants had to categorize (high vs.  
513 low) either the contrast or the variability of the stimulus array. Participants received trial-by-trial  
514 feedback about the categorisation judgment. The judgment types were counterbalanced across  
515 trials. In Experiment 5, for each block of trials, we fixed the contrast or the variability level while  
516 varying the other feature. In Experiment 6, on half of the blocks, the stimulus array consisted of

517 eight gratings and, on the other half of blocks, the stimulus array consisted of four gratings. Further  
518 experimental details are provided in the Supplementary Information.

### 519 *Statistical analyses*

520 All statistics are reported at the group level. We performed analyses of variance  
521 (ANOVAs) with participants as a random variable to test the effects of contrast and variability on  
522 choice accuracy, response times, cue usage, confidence (Exp2) and opt-in behaviour (Exp3). We  
523 performed most analyses of choice accuracy and confidence using neutral trials; analyses of cue  
524 usage were naturally based on biased trials. We used multiple linear regression and multiple  
525 logistic regression to isolate the effect of variability on confidence and opt-in responses,  
526 respectively. For the analyses in **Fig. 5A**, seven participants were excluded because of excessive  
527 opt-out responses, but result were almost identical when including them. All  $p$ -values lower than  
528 .001 are reported as “ $p < .001$ ”,  $p$ -values higher or equal than .001 but lower than .01 are reported  
529 as “ $p < .01$ ”,  $p$ -values higher or equal to .01 but lower than .05 are reported as “ $p < .05$ ”. All  $p$ -  
530 values greater or equal to .05 are reported as higher than the closest lower decimal (e.g., a  $p$ -value  
531 of .175 would be reported as “ $p > 0.1$ ”), with exception of  $p$ -values between .05 and .1 which are  
532 reported as “ $p > .05$ ”. The degrees of freedom for the ANOVAs are specified using non-integer  
533 numbers when a Greenhouse-Geisser correction has been used to correct for violations of the  
534 sphericity assumption.

535

### 536 *Computational modelling*

537 We first describe the *omniscient* model who takes into account encoding and integration  
538 noise and can identify which condition a trial is drawn from (i.e. assigns a probability of 1 to the  
539 current condition on a given trial). We then describe the *variability-mixer* model, who takes into  
540 account integration noise but cannot distinguish the variability conditions (i.e. assigns equal  
541 probability to all variability conditions on a given trial), and the *noise-blind* model, who entirely  
542 neglects integration noise. For completeness, we ran six additional models which varied an agent’s  
543 awareness of encoding noise and/or ability to discriminate contrast conditions. We only discuss  
544 these models in the Supplementary Information as they had no support in the empirical data.

545 We modelled – regardless of the model – an agent’s noisy estimate,  $x$ , of the true average  
546 orientation,  $\mu$ , as a random sample from a Gaussian distribution with mean  $\mu$  and variance  $\sigma^2$ :

$$547 \quad x = \epsilon(\mu, \sigma^2) \quad (eq. 1)$$

548

549 where  $\sigma$  is the agent’s total level of noise (encoding plus integration noise) in an experimental  
550 condition (see below for noise estimation).

551 We assumed that an omniscient agent’s internal model has, for each condition, a unique  
552 pair of category-conditioned probability density functions (PDFs) over sensory data, which reflect  
553 the total level of noise and the true probability distribution over average orientations (see **Fig. 4C**  
554 for an example). As such, an omniscient agent would have six pairs of PDFs in Experiments 1-3  
555 and four pairs of PDFs in Experiments 4-6. An omniscient agent uses the relevant pair of PDFs to  
556 compute the probability of the sensory data given a CW and a CCW category:

$$557 \quad PDF_{cat\&cond} = P(x|cat, cond) \quad (eq. 2)$$

558

559 where *cat* is the category and *cond* is the condition. We constructed the PDFs by convolving the  
560 true probability distribution over average orientations with a zero-centred Gaussian distribution  
561 with variance  $\sigma^2$  depending on a participant's total noise in a condition. Note that the construction  
562 of these PDFs is specific to the model in question (see construction of “non-omniscient” PDFs  
563 below) and is the only source of variation in model predictions about choice and confidence.

564 We assumed that an agent – regardless of the model – would compute the probability of  
565 each category using Bayes' theorem:

$$566 \quad P(\text{cat} | \text{cue}, x, \text{cond}) = \frac{P(x | \text{cat}, \text{cond}) \cdot p(\text{cat} | \text{cue})}{(P(x | \text{cat}, \text{cond}) \cdot p(\text{cat}) + P(x | \text{cat}_{\text{alt}}, \text{cond}) \cdot p(\text{cat}_{\text{alt}} | \text{cue}))}$$

567 (eq. 3)

568 where  $P(x | \text{cat}, \text{cond})$  is computed using the relevant PDFs and  $p(\text{cat})$  is the prior probability of  
569 the category in question as indicated by the prior cue. If the category in question is CW, then the  
570 alternative category,  $\text{cat}_{\text{alt}}$  is CCW, and vice versa. On neutral trials, the prior probability of each  
571 category is 50%. On biased trials, the prior probability of one category is 75% and the prior  
572 probability of the other category is 25%. The computation detailed in eq. 3 can be thought of as  
573 scaling the relevant PDFs by the prior probability of the respective category (see **Fig. 4D** for an  
574 example).

575 Finally, we assumed that an agent – regardless of the model – makes a decision, *d*, by  
576 selecting the category with higher posterior support and computes confidence in this decision as:

$$577 \quad \text{Confidence} = p(d = \text{cat} | \text{cue}, x, \text{cond})$$

578 (eq. 4)

579 which in our task is directly given by the posterior probability of the chosen category.

580 Because an omniscient agent takes into account encoding and integration noise and knows  
581 which experimental condition a trial is drawn from, she will (i) be appropriately influenced by the  
582 prior cue, (ii) accurately estimate the probability of having made a correct choice, and (iii) opt out  
583 of trials when she believes that she is less than 75% likely to be correct. We now describe two  
584 models which relax the “omniscient” assumptions.

585 We first consider a *variability-mixer* agent who is sensitive to integration noise but cannot  
586 distinguish the different variability conditions. Therefore, when estimating the probability of the  
587 sensory data given a CW and a CCW category, the variability-mixer marginalizes its estimate over  
588 all possible variability conditions (equivalent to an omniscient agent whose PDFs have been mixed  
589 across variability conditions). As a result, when orientation variability is low, the PDFs are more  
590 overlapping than for the omniscient model. Conversely, when orientation variability is high, the  
591 PDFs are less overlapping than for the omniscient model. For these reasons, a variability-mixer  
592 model would display a mixture of under- and overconfidence.

593 Finally, we consider a *noise-blind* agent who is entirely unaware of integration noise. Like  
594 in the case of the variability-mixer model, a noise-blind agent only has a pair of PDFs for each  
595 contrast level but, unlike in the case of a variability-mixer model, these PDFs only take into  
596 account encoding noise. As a result, when orientation variability is non-zero, the PDFs are less  
597 overlapping than under either of the two other models (**Fig. 4E**) and a noise-blind agent would  
598 therefore tend to hold stronger posterior beliefs (i.e. steeper curves for **Fig.4F**). Such stronger  
599 posterior beliefs will lead a noise-blind agent to (i) be less influenced by the prior cue than needed,

600 (ii) overestimate the probability of having made a correct choice, and (iii) not opt out of trials when  
601 being less than 75% likely to be correct.

602 We note that the models make the same predictions about choice on neutral trials but are  
603 distinguishable when focusing on (i) biased trials and (ii) confidence and opt-in behaviour on both  
604 neutral and biased trials. Our modelling approach allowed us to calculate a choice probability for  
605 each trial under a given model. For model analyses requiring a categorical choice (e.g., logistic  
606 regression), we sampled choices according to these choice probabilities.

### 607 *Noise estimation*

608 We assumed that each experimental condition was affected by Gaussian noise with a specific  
609 standard deviation,  $\sigma_{cond}$ . We assumed that encoding noise depends upon the contrast of the array  
610 and that integration noise is proportional to the variability of orientations in the array. We estimated  
611 the total level of noise for each condition using four free parameters (three for Experiments 4-6).  
612 Two parameters characterised the level of encoding noise for each contrast level: one for low  
613 contrast ( $nC_{low}$ ) and one for high contrast ( $nC_{high}$ ). The other two parameters (one for Experiments  
614 4-6) characterised the level of integration noise for each variability level: one for medium  
615 variability ( $nV_{med}$ , only for Experiments 1-3) and one for high variability ( $nV_{high}$ ). For a given  
616 condition, the total level of noise (the standard deviation of the Gaussian noise distribution),  $\sigma_{cond}$ ,  
617 is thus given by:

$$618 \quad \sigma_{cond} = \sqrt{(\epsilon\sigma_{cond}^2) + (i\sigma_{cond}^2)} \quad (eq. 5)$$

619

620 where  $\epsilon\sigma_{cond}$  and  $i\sigma_{cond}$  specify the contribution of encoding noise and integration noise,  
621 respectively. For instance, for the low-contrast, high-variability condition would be given by  
622 substituting  $nC_{low}$  for  $\epsilon\sigma_{cond}$  and  $nV_{high}$  for  $i\sigma_{cond}$ .

623 We fitted the four noise estimators for each participant by maximizing the likelihood of the  
624 participant's choice using neutral trials only (we used a genetic algorithm with a population size  
625 of 100 individuals and a maximum generation time of 1000 generations). We note that, because of  
626 our factorial design, we could separate the two sources of noise. We used the fitted parameters for  
627 each participant to construct the model PDFs described above. We stress that the noise estimation  
628 use choices on neutral trials only and that the model predictions pertain to independent features of  
629 the data: (i) confidence on neutral trial choices, (ii) choices (and choice probabilities) on biased  
630 trials, and (iii) probability of opting out.

631 The mean  $\pm$  SEM of the best fitting values for the four noise parameters ( $nC_{low}$ ,  $nC_{high}$ ,  $nV_{med}$   
632 and  $nV_{high}$ ) in units of degrees were:  $10.10 \pm 1.51$ ,  $3.31 \pm 0.39$ ,  $3.0 \pm 0.78$  and  $6.8 \pm 1.0$ , respectively.  
633 Following equation 5, the estimated total amounts of noise fitted for the three key conditions  
634 (baseline, low-c and high-v) were therefore:  $3.31 \pm 0.39$ ,  $10.1 \pm 1.51$  and  $8.0 \pm 1.0$ , respectively.  
635 There was a significant difference between the values for the baseline condition and those for the  
636 other two conditions (both p-values  $< 0.001$ ), but no significant difference between the low-c and  
637 high-v conditions (p-value  $> 0.16$ ).

### 638 639 *Psychometric fits*

640 We fitted psychometric curves to the average proportion of clockwise choices using a four-  
641 parameter logistic function:

642 
$$P = \frac{A_1 - A_2}{1 + e^{(x-x_0)/dx}} + A_2$$

643 (eq. 6)

644 where  $P$  is the proportion of CW choices,  $A_1$  is the right asymptote,  $A_2$  is the left asymptote,  $x_0$  is  
645 the inflection point and  $1/dx$  is the steepness, and  $x$  is the average stimulus orientation at which  
646 the proportion of CW choices is evaluated. We computed the proportion of clockwise choices  
647 within average-orientation bins (i.e. six quantiles over the average orientation relative to  
648 horizontal). The psychometric curves shown in **Fig. 2B** are only used for illustration.

#### 649 *Bias index*

650 We used Signal Detection Theory (Macmillan & Creelman, 2004; Stanislaw & Todorov,  
651 1999) to calculate the decision criteria,  $c$ , separately for trials on which the prior cue favoured CW  
652 and trials on which the prior favoured CCW. The decision criterion provides a signed estimate of  
653 the degree to which the prior cue biases a participants' choices independently of their sensitivity  
654 to average orientation. We computed the criterion as,  $c = -0.5[\Phi^{-1}(HR) + \Phi^{-1}(FAR)]$ , where  
655  $\Phi^{-1}$  represents the inverse of the normal cumulative density function, and HR and FAR represent  
656 the hit rate (i.e. the proportion of CW trials where participants responded CW) and false alarm rate  
657 (i.e. the proportion of CCW trials where participants responded CW), respectively. We then used  
658 the difference between  $c$  when cued CW ( $c_{CW}$ ) and  $c$  when cued CCW ( $c_{CCW}$ ) as our measure of  
659 cue usage: bias index =  $c_{CW} - c_{CCW}$ . Higher values indicate greater cue usage. We computed a bias  
660 index for each participant and each experimental condition.

661 **References**

- 662 Ackermann, J. F., & Landy, M. S. (2014). Suboptimal decision criteria are predicted by subjectively weighted  
663 probabilities and rewards. *Attention, Perception, & Psychophysics*, *77*(2), 638–658.
- 664 Aitchison, L., Bang, D., Bahrami, B., & Latham, P. E. (2015). Doubly Bayesian analysis of confidence in perceptual  
665 decision-making. *PLoS Computational Biology*, *11*(10), e1004519.
- 666 Bach, D. R., & Dolan, R. J. (2012). Knowing how much you don't know: a neural organization of uncertainty  
667 estimates. *Nature Reviews Neuroscience*, *13*(8), 572.
- 668 Bang, D., Aitchison, L., Moran, R., Hecce Castañón, S., Rafiee, B., Mahmoodi, A., ... Summerfield, C. (2017).  
669 Confidence matching in group decision-making. *Nature Human Behaviour*, *1*(6), s41562–017.
- 670 Bar-Hillel, M. (1980). The base-rate fallacy in probability judgments. *Acta Psychologica*, *44*(3), 211–233.
- 671 Beck, J. M., Ma, W. J., Pitkow, X., Latham, P. E., & Pouget, A. (2012). Not noisy, just wrong: the role of  
672 suboptimal inference in behavioral variability. *Neuron*, *74*(1), 30–39.
- 673 Botvinick, M. M., Braver, T. S., Barch, D. M., Carter, C. S., & Cohen, J. D. (2001). Conflict monitoring and  
674 cognitive control. *Psychological Review*, *108*(3), 624.
- 675 Brunswik, E. (1956). *Perception and the representative design of experiments*. CA: Berkeley: University of  
676 California Press.
- 677 Drugowitsch, J., Moreno-Bote, R., & Pouget, A. (2014). Relation between belief and performance in perceptual  
678 decision making. *PLoS One*, *9*(5), e96511.
- 679 Drugowitsch, J., Wyart, V., Devauchelle, A.-D., & Koechlin, E. (2016). Computational Precision of Mental  
680 Inference as Critical Source of Human Choice Suboptimality. *Neuron*, *92*(6), 1398–1411.
- 681 Eriksen, B. A., & Eriksen, C. W. (1974). Effects of noise letters upon the identification of a target letter in a  
682 nonsearch task. *Perception & Psychophysics*, *16*(1), 143–149.
- 683 Ernst, M. O., & Banks, M. S. (2002). Humans integrate visual and haptic information in a statistically optimal  
684 fashion. *Nature*, *415*(6870), 429–433.
- 685 Faisal, A. A., & Wolpert, D. M. (2009). Near optimal combination of sensory and motor uncertainty in time during a  
686 naturalistic perception-action task. *Journal of Neurophysiology*, *101*(4), 1901–1912.
- 687 Frydman, C., & Camerer, C. F. (2016). The Psychology and Neuroscience of Financial Decision Making. *Trends in*  
688 *Cognitive Sciences*, *20*(9), 661–675.
- 689 Gershman, S. J., Horvitz, E. J., & Tenenbaum, J. B. (2015). Computational rationality: A converging paradigm for  
690 intelligence in brains, minds, and machines. *Science*, *349*(6245), 273–278.
- 691 Hampton, R. R. (2001). Rhesus monkeys know when they remember. *Proceedings of the National Academy of*  
692 *Sciences*, *98*(9), 5359–5362.
- 693 Hertwig, R., & Erev, I. (2009). The description–experience gap in risky choice. *Trends in Cognitive Sciences*,  
694 *13*(12), 517–523.
- 695 Hunt, L. T. (2014). What are the neural origins of choice variability? *Trends in Cognitive Sciences*, *18*(5), 222–224.
- 696 Jarvstad, A., Hahn, U., Rushton, S. K., & Warren, P. A. (2013). Perceptuo-motor, cognitive, and description-based  
697 decision-making seem equally good. *Proceedings of the National Academy of Sciences*, *110*(40), 16271–  
698 16276.
- 699 Juslin, P., & Olsson, H. (1997). Thurstonian and Brunswikian origins of uncertainty in judgment: a sampling model  
700 of confidence in sensory discrimination. *Psychological Review*, *104*(2), 344.
- 701 Kahneman, D. (2011). *Thinking, fast and slow*. Macmillan.
- 702 Kahneman, D., & Tversky, A. (1973). On the psychology of prediction. *Psychological Review*, *80*(4), 237.
- 703 Kass, R. E., & Raftery, A. E. (1995). Bayes factors. *Journal of the American Statistical Association*, *90*(430), 773–  
704 795.

- 705 Kepecs, A., & Mainen, Z. F. (2012). A computational framework for the study of confidence in humans and  
706 animals. *Philosophical Transactions of the Royal Society of London B: Biological Sciences*, 367(1594),  
707 1322–1337.
- 708 Kersten, D., Mamassian, P., & Yuille, A. (2004). Object perception as Bayesian inference. *Annu. Rev. Psychol.*, 55,  
709 271–304.
- 710 Kiani, R., & Shadlen, M. N. (2009). Representation of confidence associated with a decision by neurons in the  
711 parietal cortex. *Science*, 324(5928), 759–764.
- 712 Knill, D. C., Kersten, D., & Yuille, A. (1996). Introduction: A Bayesian formulation of visual perception.  
713 *Perception as Bayesian Inference*, 1–21.
- 714 Körding, K. P., & Wolpert, D. M. (2004). Bayesian integration in sensorimotor learning. *Nature*, 427(6971), 244–  
715 247.
- 716 Körding, K. P., & Wolpert, D. M. (2006). Bayesian decision theory in sensorimotor control. *Trends in Cognitive  
717 Sciences*, 10(7), 319–326.
- 718 Levitt, S. D., & List, J. A. (2007). What Do Laboratory Experiments Measuring Social Preferences Reveal About  
719 the Real World? *The Journal of Economic Perspectives*, 21(2), 153–174.
- 720 Ma, W. J., Beck, J. M., Latham, P. E., & Pouget, A. (2006). Bayesian inference with probabilistic population codes.  
721 *Nature Neuroscience*, 9(11), 1432–1438.
- 722 Ma, W. J., & Jazayeri, M. (2014). Neural coding of uncertainty and probability. *Annual Review of Neuroscience*, 37,  
723 205–220.
- 724 MacLeod, C. M. (1991). Half a century of research on the Stroop effect: an integrative review. *Psychological  
725 Bulletin*, 109(2), 163.
- 726 Macmillan, N. A., & Creelman, C. D. (2004). *Detection theory: A user's guide*. Psychology press.
- 727 Mamassian, P., Landy, M. S., & Maloney, L. T. (2002). Bayesian modelling of visual perception. *Probabilistic  
728 Models of the Brain: Perception and Neural Function*, 13–36.
- 729 O'Reilly, J. X., Jbabdi, S., Rushworth, M. F., & Behrens, T. E. (2013). Brain systems for probabilistic and dynamic  
730 prediction: computational specificity and integration. *PLoS Biology*, 11(9).
- 731 Payzan-LeNestour, E., & Bossaerts, P. (2011). Risk, unexpected uncertainty, and estimation uncertainty: Bayesian  
732 learning in unstable settings. *PLoS Computational Biology*, 7(1), e1001048.
- 733 Saposnik, G., Redelmeier, D., Ruff, C. C., & Tobler, P. N. (2016). Cognitive biases associated with medical  
734 decisions: a systematic review. *BMC Medical Informatics and Decision Making*, 16(1), 138.
- 735 Simons, D. J., & Levin, D. T. (1997). Change blindness. *Trends in Cognitive Sciences*, 1(7), 261–267.
- 736 Sonnemans, J., & Theo Offerman, T. (2001). Is the quadratic scoring rule behaviorally incentive compatible?
- 737 Stanislaw, H., & Todorov, N. (1999). Calculation of signal detection theory measures. *Behavior Research Methods,  
738 Instruments, & Computers*, 31(1), 137–149.
- 739 Summerfield, C., & Tsetsos, K. (2015). Do humans make good decisions? *Trends in Cognitive Sciences*, 19(1), 27–  
740 34.
- 741 Sun, J., & Perona, P. (1998). Where is the sun? *Nature Neuroscience*, 1(3), 183–184.
- 742 Thurstone, L. L. (1927). A law of comparative judgment. *Psychological Review*, 34(4), 273.
- 743 Trommershäuser, J., Maloney, L. T., & Landy, M. S. (2008). Decision making, movement planning and statistical  
744 decision theory. *Trends in Cognitive Sciences*, 12(8), 291–297.
- 745 Tversky, A., & Kahneman, D. (1974). Judgment under uncertainty: Heuristics and biases. *Science*, 185(4157),  
746 1124–1131.
- 747 Vilares, I., Howard, J. D., Fernandes, H. L., Gottfried, J. A., & Körding, K. P. (2012). Differential representations of  
748 prior and likelihood uncertainty in the human brain. *Current Biology*, 22(18), 1641–1648.
- 749 Wyart, V., Nobre, A. C., & Summerfield, C. (2012). Dissociable prior influences of signal probability and relevance  
750 on visual contrast sensitivity. *Proceedings of the National Academy of Sciences*, 109(9), 3593–3598.

- 751 Zakay, D., & Tuvia, R. (1998). Choice latency times as determinants of post-decisional confidence. *Acta*  
752 *Psychologica*, 98(1), 103–115.
- 753 Zylberberg, A., Fetsch, C. R., & Shadlen, M. N. (2016). The influence of evidence volatility on choice, reaction time  
754 and confidence in a perceptual decision. *ELife*, 5, e17688.
- 755



## 756 **Supplementary Information**

757

### 758 *Experimental details*

759 In all experiments, participants had to judge the average orientation of an array of gratings  
760 as clockwise (CW) or counter-clockwise (CCW) from horizontal. We first describe trial events,  
761 trial timings and stimulus construction for Experiment 1 and then explain the additional steps taken  
762 for Experiments 2-6.

763 In Experiment 1, a fixation dot first appeared at the centre of the screen for 300 ms to  
764 announce the start of a trial. The fixation dot was replaced by a cue which appeared 700 ms before  
765 the stimulus array and which remained on the screen until a response was registered. The cue  
766 determined the prior probability of each stimulus category (“L”: prior probability of CCW is 75%;  
767 “N”: CCW and CW equally likely; “R”: prior probability of CW is 75%). The stimulus array was  
768 shown for 150 ms and was followed by an up-to 3000 ms long response window. Participants  
769 responded by pressing the left (CCW) or right (CW) arrow-key on a QWERTY keyboard using  
770 their right hand. Categorical feedback about choice accuracy (“CORRECT” or “WRONG”)  
771 appeared once a response had been registered and remained on the screen for 500 ms, before the  
772 onset of the next trial. If no response was registered within the response period, the word “LATE”  
773 appeared at the centre of the screen for 3000 ms, and the next trial was automatically started.

774 The stimulus was composed of eight gratings displayed within a circular array. We  
775 manipulated two features of the stimulus array in a factorial manner: the contrast of the gratings  
776 and the variability of the gratings’ orientation.

777 The centre of each grating was located at a distance of ~4.3 degrees of visual angle (400  
778 pixels) from the centre of the screen. Each grating was a Gabor patch constructed using the  
779 following parameter values: diameter of ~1.07 degrees of visual angle (100 pixels); spatial  
780 frequency of ~5 cycles per degree of visual angle (0.05 cycles per pixel); random phase. All  
781 gratings had the same root mean square contrast (rmc, henceforth contrast). The contrast of a trial  
782 was either 0 (no signal), .15 (low contrast) or .60 (high contrast). The latter two contrast levels  
783 may not affect orientation discrimination on their own (Mareschal & Shapley, 2004). However,  
784 we added low-level random noise to the gratings (Wyart, Nobre, & Summerfield, 2012). For each  
785 grating, we convolved a unique patch of white noise with a two-dimensional zero-mean Gaussian  
786 with a standard deviation of ~0.21 degrees of visual angle (20 pixels). The amplitude of the noise  
787 was 10% of the maximum possible. We then added the noise to the grating. Finally, we convolved  
788 the grating with a 2-dimensional Gaussian envelope peaking at the centre of the grating and  
789 decaying with a standard deviation of ~0.21 degrees of visual angle (20 pixels).

790 The average orientation of gratings on a trial (henceforth trial mean) was randomly drawn  
791 from a Gaussian distribution with a mean of  $\pm 3^\circ$  and a standard deviation of  $8^\circ$ . The variability  
792 in the orientations of gratings on a trial (henceforth variability) was randomly drawn from a  
793 Gaussian distribution with a mean  $0^\circ$  and a standard deviation of either  $0^\circ$  (zero variability),  $4^\circ$   
794 (medium variability) or  $10^\circ$  (high variability). To ensure the trial mean remained unchanged after  
795 the variability manipulation, we subtracted the mean deviation from 0 from the gratings’  
796 orientations. Together, these steps allowed us to independently manipulate trial mean, contrast and  
797 variability. We emphasise that feedback was determined by the average orientation of the gratings  
798 presented and not by the distribution from which they were drawn.

799 The experiment consisted of 1296 trials, distributed into 36 blocks of 36 trials each. On half  
800 of the blocks, the prior cue was “N” (neutral trials). On the other half of blocks, the cue varied  
801 between “L” or “R” in a trial-by-trial manner (biased trials). Block order was randomised across  
802 an experiment and across participants.

803 In Experiment 2, we introduced an explicit measure of confidence. Participants indicated  
804 their choice by pressing “Z” (CCW) or “X” (CW) using their left hand. After having made a choice,  
805 participants had to indicate the probability that the choice is correct. Participants indicated their  
806 confidence by sliding a marker along a vertical scale (50% to 100% in increments of 1%) using a  
807 standard computer mouse with their right hand. The probability associated with the marker’s  
808 current position was updated in real-time and shown at the centre of the screen. Participants  
809 confirmed their response by clicking the left button of the mouse. There was no time limit for the  
810 confidence judgment. Feedback about choice accuracy appeared 300 ms after a response had been  
811 confirmed. Trial numbers, block types and structure were the same as for Experiment 1.

812 In Experiment 3, we introduced an implicit measure of confidence. On half of the blocks,  
813 participants could choose to opt out of making a choice and receive the same reward as a correct  
814 choice with a 75% probability. To remind participants about the choice options on a trial, the words  
815 “LEFT” (CCW) and “RIGHT” (CW) appeared to the left and the right of the fixation cross after  
816 the stimulus disappeared and, when the opt-out option was available, the words “OPT OUT”  
817 appeared below the fixation cross. The opt-out option was selected by pressing the downwards  
818 arrow key. For feedback, “SUCCESS” was shown after a correct choice and a rewarded opt-out  
819 response, whereas “FAILURE” was shown after an incorrect choice and an unrewarded opt-out  
820 response. The experiment consisted of 1296 trials, distributed into 36 blocks of 36 trials each. On  
821 half of the blocks, the opt-out option was not available. On the other half of the blocks, the opt-out  
822 option was available. Block order was randomised across an experiment and across participants.  
823 There was no prior cue.

824 In Experiment 4, we asked participants to categorise either the contrast ( $rmc = \{.15, .60\}$ )  
825 or the variability ( $std = \{0^\circ, 10^\circ\}$ ) of the stimulus array. In particular, after having made a choice  
826 (by pressing the “X” and “Z” buttons using their left hand, with the chosen category highlighted  
827 in bold), participants were then required to judge whether the contrast of the stimulus array was  
828 high or low or whether the variability of the stimulus array was high or low. The relevant stimulus  
829 dimension for the second judgment (indicating by displaying “CONTRAST” or “VARIABILITY  
830 at the centre of the screen), was determined randomly and was only revealed after an orientation  
831 discrimination had been made. Participants made the second judgment by pressing the left (low)  
832 or the right (high) arrow key (the options “LOW” and “HIGH” appeared equidistantly to the left  
833 and the right of the fixation point). Once participants had made their response, they received  
834 feedback about the accuracy of each judgment, indicated by changing the colours of the selected  
835 options to red (incorrect) or green (correct). The experiment consisted of 1200 trials, distributed  
836 into 32 blocks of 40 trials each. On half of the blocks, the prior cue was “N” (neutral trials). On  
837 the other half of blocks, the cue varied between “L” or “R” in a trial-by-trial manner (biased trials).  
838 Block order was randomised across an experiment and across participants.

839 In Experiment 5, we fixed either contrast or variability across blocks of trials. Specifically,  
840 within a block, one dimension was fixed (low or high), while the other dimension varied randomly  
841 (low or high). For instance, in one condition, contrast would be fixed at low while variability varied  
842 between high and low across the trials within the block. As in Experiment 4, there were only two  
843 levels of contrast and two levels of variability. There were thus eight blocks for each trial type. On

844 half of the blocks for a trial type, the prior cue was “N” (neutral trials). On the other half of blocks  
845 for a trial type, the prior cue varied between “L” or “R” in a trial-by-trial manner (biased trials).  
846 The experiment consisted of 1200 trials, distributed into 32 blocks of 40 trials each. Block order  
847 was randomised across an experiment and across participants.

848 In Experiment 6, we varied the set-size of the stimulus array. In particular, the stimulus  
849 array was composed of either four or eight gratings. As in Experiments 4 and 5, there were only  
850 two levels of contrast and two levels of variability. For arrays with only four gratings, the location  
851 of the gratings was fixed within a block but randomised across blocks, by sampling a random set  
852 of four contiguous locations from the full array with eight gratings. The set-size was varied in a  
853 trial-by-trial manner. Half of the trials had a set-size of four gratings and the other half of trials  
854 had a set-size of eight gratings. We scaled the variance of the distribution of orientation  
855 variabilities for the four-item set size to ensure that the observed standard deviation of orientations  
856 within a set-size was equated for the four-item and eight-item case. Without this step, the observed  
857 variance of the four-item set size would be systematically lower than for the eight-item set-size.  
858 The experiment consisted of 1200 trials, distributed into 32 blocks of 40 trials each. On half of the  
859 blocks, the prior cue was “N” (neutral trials). On the other half of blocks, the cue varied between  
860 “L” or “R” in a trial-by-trial manner (biased trials). Block order was randomised across an  
861 experiment and across participants.

862 All participants were reimbursed for their participation and had the opportunity to earn an  
863 additional performance-based bonus. In all experiments except Experiment 2, participants received  
864 a flat rate of £10 and could earn an additional £1 for every 2% increase in choice accuracy relative  
865 to 60%. In Experiment 2, participants received a flat rate of £5 and could earn an additional bonus  
866 depending on the accuracy of their confidence judgments. We submitted participant’ responses to  
867 a strictly proper scoring rule under which it was in participants’ best interest to make as many  
868 correct decisions as possible and to estimate the probability that their choice is correct as accurately  
869 as possible (Sonnemans & Theo Offerman, 2001). The average bonus accrued was ~£12.

870 Participants received a 10-minute introduction to their corresponding task, including the  
871 stimulus, sources of choice difficulty, prior cue and prior probabilities, response contingencies,  
872 and the rules behind the performance-based bonus. Participants also completed a short practice  
873 session (two blocks) of the task before starting the experiment proper.

#### 874 *Category-conditioned probability density functions for an omniscient agent*

875 We assumed that an omniscient agent’s internal model has, for each experimental  
876 condition, a unique pair of category-conditioned probability density functions (PDFs) over sensory  
877 data. An example of a full set of PDFs are shown in **Fig. S1**. Note that the PDFs look more skewed  
878 in conditions with low noise (top-left in **Fig. S1**) as they will more closely resemble the true  
879 distribution of average orientations (**Fig. 4A**).

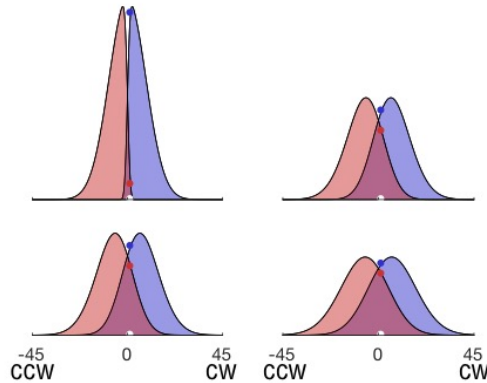

880

881 **Fig. S1. Category-conditioned probability density functions.** Four pairs of PDFs, one for each of the  
 882 four conditions in Experiment 4-6 (but six pairs of PDFs for Experiments 1-3). Top-left: high-contrast and  
 883 low-variability trials (lowest noise). Top-right: high-contrast and high-variability trials (intermediate noise).  
 884 Bottom-left: low-contrast and low-variability trials (intermediate noise). Bottom-right: low-contrast and  
 885 high-variability trials (highest noise). The white dots on the x-axes denote an agent's current sensory data  
 886 (same across panels). The blue and red dots indicate the probability density that the sensory data came from  
 887 a CW or a CCW category, respectively.

### 888 *Comparison of computational models*

889 All models considered share the same generative (true) model of how sensory data is  
 890 generated but differ in their internal model of this process. In particular, they differed with respect  
 891 to (i) an agent's ability to identify which condition a trial is drawn from and (ii) an agent's  
 892 sensitivity to the different sources of noise in play. These differences give rise to different  
 893 inferences and thereby responses. We compared a total of nine candidate models of our data. In  
 894 **Table S1**, we provide the model names (column 1), quantitative comparison against the noise-  
 895 blind model which was the best-fitting model (column 2), and details about model assumptions  
 896 (columns 3-9). Note that the number of unique pairs of category-conditioned PDFs depends on the  
 897 experiment (the first number is for Exp1-3; the number in brackets is for Exp4-6). For  
 898 completeness, we considered models which intuitively seemed unlikely (e.g., the Full Mixer model  
 899 who cannot tell at all discriminate experimental conditions), or are not grounded on optimality  
 900 (e.g. the models that operate with the average noise across conditions).

| Model Name          | Average BIC difference with best model | Number of unique pairs of PDFs | Is blind to Encoding Noise? | Knows the contrast condition of each trial? | Is blind to Integration Noise? | Knows the variability condition of each trial? | Operates with the average Encoding Noise? | Operates with the average Integration Noise? |
|---------------------|----------------------------------------|--------------------------------|-----------------------------|---------------------------------------------|--------------------------------|------------------------------------------------|-------------------------------------------|----------------------------------------------|
| Omniscient          | -32.98                                 | 6 (4)                          | no                          | yes                                         | no                             | yes                                            | no                                        | no                                           |
| Noise Blind         | 0.00                                   | 2 (2)                          | no                          | yes                                         | yes                            | irrelevant                                     | no                                        | no                                           |
| Variability Mixer   | -20.41                                 | 2 (2)                          | no                          | yes                                         | no                             | no                                             | no                                        | no                                           |
| Contrast Mixer      | -60.39                                 | 3 (2)                          | no                          | no                                          | no                             | yes                                            | no                                        | no                                           |
| Full Mixer          | -58.57                                 | 1 (1)                          | no                          | no                                          | no                             | no                                             | no                                        | no                                           |
| Average Variability | -47.28                                 | 2 (2)                          | no                          | yes                                         | no                             | no                                             | no                                        | yes                                          |
| Average Contrast    | -116.93                                | 3 (2)                          | no                          | no                                          | no                             | yes                                            | yes                                       | no                                           |
| Full Average        | -134.76                                | 1 (1)                          | no                          | no                                          | no                             | no                                             | yes                                       | yes                                          |
| Contrast Blind      | -9.79                                  | 3 (2)                          | yes                         | irrelevant                                  | no                             | yes                                            | no                                        | no                                           |

901

902 **Table S1.** Model assumptions and model comparison. Model comparison was based on the difference in  
 903 average BIC across participants (Exp1-3) relative to the noise-blind model.

904

904 *Overconfidence in choices*

905 A main difference between the variability-mixer and the noise-blind models is the  
906 predicted pattern of *overconfidence* (i.e. mean confidence minus mean accuracy) across the key  
907 conditions of our factorial design. The variability-mixer model predicts a hard-easy effect, with  
908 overconfidence for the high-variability condition and underconfidence for the baseline condition.  
909 By comparison, while the noise-blind model also predicts overconfidence for the high-variability  
910 condition, it predicts good calibration for the baseline condition. Indeed, as expected under the  
911 noise-blind model, participants were overconfident in the high-variability condition but well-  
912 calibrated in the baseline condition (**Fig S2**).

913

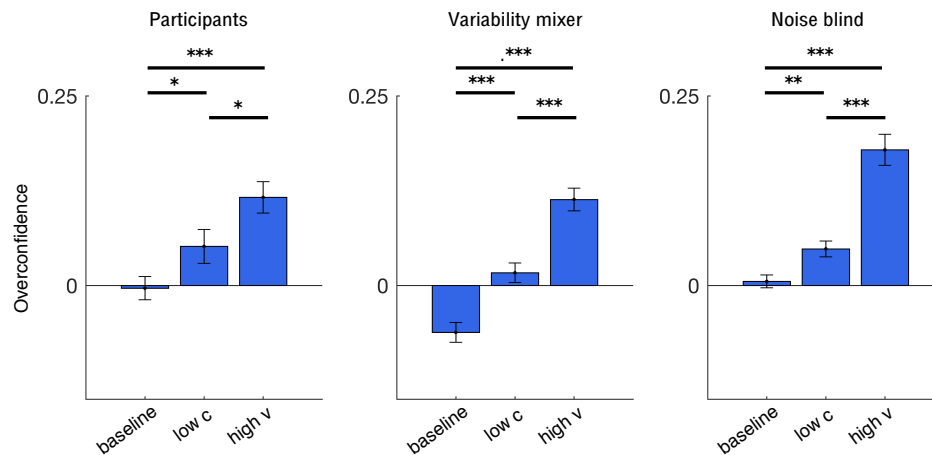

914 **Fig. S2. Noise-blind model accounts for empirical pattern of overconfidence.** Participants (left) are  
915 well-calibrated in the baseline condition but overconfident in the other conditions. The variability-mixer  
916 model (middle) shows under-confidence in the baseline condition but overconfidence in the high-variability  
917 condition. The noise-blind model shows good calibration in the baseline condition and overconfidence in  
918 the high-variability condition. Near-zero values indicate good calibration and non-zero values indicate bad  
919 calibration. Negative values indicate under-confidence and positive values indicate overconfidence. Data  
920 is from neutral trials of Experiment 2 and represented as group mean  $\pm$  SEM.  
921

922 *Sequential sampling model*

923 To test the sequential sampling account of suboptimal behaviour proposed by Zylberberg and  
924 colleagues (Zylberberg et al., 2016), we fitted a Drift Diffusion Model (DDM) to the data from  
925 Experiments 1-2. The DDM models two-choice decision-making as a process of accumulating  
926 noisy evidence over time with a certain speed, or drift-rate, until one of two choice thresholds is  
927 crossed and the associated response is executed. We assumed that the choice thresholds were fixed  
928 across experimental conditions as in the study by Zylberberg and colleagues. In addition, we  
929 assumed that lower contrast led to a lower mean of the drift-rate and that higher variability led to  
930 higher variance of the drift-rate. The base drift-rate was proportional to the absolute difference  
931 between the average orientation and horizontal. We implemented these mechanisms using three  
932 parameters. The first parameter depends on the contrast level and scales the drift-rate. The second  
933 parameter specifies the baseline variance of the drift-rate. Finally, the third parameter depends on  
934 the variability level and scales the baseline variance of the drift-rate. To find the best parameters  
935 for each participant, we minimized the sum of squared errors between empirical and predicted  
936 choice accuracy across experimental conditions (we used a genetic algorithm with a population

937 size of 1000 individuals and a maximum generation time of 1000 generations). Comparison  
 938 between empirical data and model predictions are shown in **Fig. S3** using a similar analyses as  
 939 Zylberberg and colleagues (2016). In short, the model can predict the observed choice accuracy  
 940 for the different conditions (**Fig. S3A**), but it predicts a pattern of response times with respect to  
 941 stimulus variability opposite to what we observed (**Fig. S3B**). As a sanity check, we show that  
 942 higher evidence strength (i.e. absolute deviation of the average orientation from the category  
 943 boundary) indeed increases choice accuracy and fastens response times (**Fig. S3C-F**).

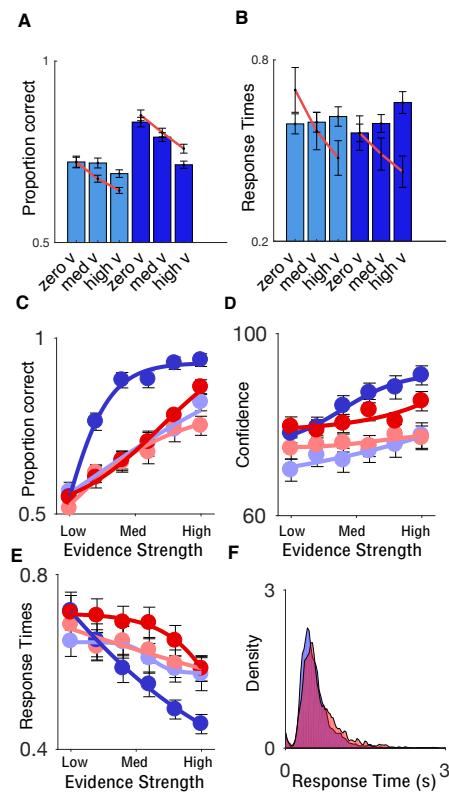

944  
 945 **Fig. S3. Common choice threshold in a sequential sampling model cannot explain our data.** (A) Choice  
 946 accuracy for participants (blue bars) and DDMs (red lines) is lower when contrast is low (compare pale  
 947 blue and dark blue bars) and when variability is high (negative slopes as condition changes from zero-v to  
 948 high-v). (B) Response times for participants and DDMs show opposite effects for increases in variability  
 949 (positive slopes for participants but negative ones for DDMs). (C) Participants' choice accuracy for  
 950 different levels of evidence strength (blue: low variability, red: high variability; faint colours: low contrast;  
 951 dark colours: high contrast). Note that the two critical conditions, high-variability and high-contrast trials  
 952 (dark red curve) and low-contrast and zero-variability trials (faint blue curve), have similar slopes. (D)  
 953 Participants' confidence for different levels of evidence strength (same colour scheme as in panel c). (E)  
 954 Participants' response times for different levels of evidence strength (same colour scheme as in panel c).  
 955 (F) Collapsing response times across participants for high-contrast and zero-variability trials (blue) and  
 956 high-contrast and high-variability trials (red) demonstrate that high variability is associated with slower  
 957 response times (i.e. red distribution has a longer tail). Data is from neutral trials of Experiments 1-2 and  
 958 represented as group men  $\pm$  SEM. For panels C-E, evidence strength is divided into quantile bins of roughly  
 959 one degree of width starting at zero.

960

## 961 *Subsampling*

962 In our experiments, we observed a consistent decrease in performance for trials with high  
963 stimulus variability. We attributed this decrease to integration noise – an increased difficulty for  
964 integrating variable or disparate pieces of information – which can explain both decreased choice  
965 accuracy and increased response times for high-variability stimuli. An alternative explanation for  
966 the decrease in accuracy for high-variability stimuli is, however, that participants only based their  
967 judgments on a subset of the items in a stimulus array. Under this subsampling account, the  
968 decrease in accuracy is due to a larger mismatch between the actual average orientation of the full  
969 array and the average orientation of the sampled subset. Here we describe why subsampling is an  
970 unlikely explanation for the decrease in accuracy for high variability trials, and why subsampling  
971 cannot explain noise blindness.

972 First, we found no effect of set-size on accuracy in Experiment 6 (**Fig. S4A**) which was  
973 designed to show a difference in performance between set-sizes if participants were indeed  
974 subsampling. More specifically, in this experiment, the distribution of average orientations was  
975 the same for both set-sizes. Therefore, if participants sampled all items, then there would be no  
976 *mismatch* and thus no difference in performance between the two set-sizes, and the decrease in  
977 performance between the *baseline* and *high-v* conditions cannot be explained by subsampling. If,  
978 on the other hand, subsampling did occur, it would have a bigger effect on performance on trials  
979 where the stimulus arrays are composed of eight-item than on trials with four items. For instance,  
980 if participants could sample four items, then there would be no difference in performance between  
981 the *baseline* and the *high-v* conditions for four-item arrays (because there would be no mismatch),  
982 but there would be a difference for eight-item arrays (because half of the items would have been  
983 ignored). Experimentally, we found that the decrease in performance between the *baseline* and the  
984 *high-v* conditions was consistent across set-sizes and comparable to that found in the previous  
985 experiments (**Fig. S4A**). We note that another prediction for Experiment 6 is that accuracy should  
986 be higher on eight-item than four-item trials because encoding noise could be averaged out over  
987 more items. However, the data does not support this prediction. One possibility is that there is a  
988 trade-off between the number of items that are encoded and the quality with which they are  
989 encoded (Van den Berg, Shin, Chou, George, & Ma, 2012) – a trade-off which may overshadow  
990 the expected boost in performance from averaging out encoding noise.

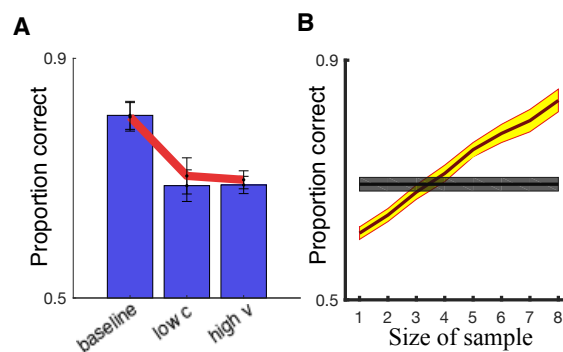

991 **Fig. S4. Noise blind and not subsampling.** (A) Participants in Experiment 6 achieved similar levels of  
992 performance when required to integrate four items (blue bars) and eight items (red line). (B) Choice  
993 accuracy for participants (grey shade) and a subsampling model (yellow shade). The subsampling model,  
994 which has no integration noise and therefore perfectly averages the sampled gratings, would need to sample

995 about four gratings before reaching the same level of choice accuracy as participants. **(A-B)** Data is  
996 represented as group mean  $\pm$  SEM.

997 Second, we performed a set of simulations for a subsampling agent without integration  
998 noise where we varied the number of items sampled (**Fig. S4B**). As such, the simulations were  
999 carried out assuming that, for arrays made up of eight gratings, the decrease in accuracy between  
1000 the baseline and high- $v$  conditions was entirely driven by subsampling. While sampling four-items  
1001 could in principle explain the decrease in accuracy between the baseline and high- $v$  conditions for  
1002 eight-item arrays, the same number of sampled items would represent the complete stimulus for  
1003 arrays of four-item arrays and no expected decrease in performance should be found for high- $v$   
1004 compared to baseline trials.

1005 Third, we fitted a subsampling model to participants' data (only neutral trials) to directly  
1006 quantify the number of items sampled by each participant ( $n = 60$ ; Exp1-3). The model had three  
1007 free parameters. The first parameter controls the noise added to each item of the array in the  
1008 baseline condition. The second parameter controls the extra amount of noise added to each item in  
1009 trials where the contrast is low (to capture the extent of encoding noise). Finally, the third  
1010 parameter controls the number of gratings,  $k$ , that were sampled from a stimulus array;  $k$  is an  
1011 integer value between one (the minimum number of items that can be sampled) and eight (the total  
1012 amount of items that can be sampled). We fitted the parameters by maximising the likelihood of  
1013 participants' choices using a genetic algorithm with a population size of 100 individuals and a  
1014 maximum generation time of 1000 generations. Note that this subsampler account does not have  
1015 integration noise and any reduction in accuracy for high-variability stimuli would have to be due  
1016 to subsampling. Even then, the fitted  $k$ -parameter was eight for most participants (**Table S2**).

| Best fitting $k$       | 1 | 2 | 3 | 4 | 5 | 6 | 7 | 8  |
|------------------------|---|---|---|---|---|---|---|----|
| Number of participants | 1 | 2 | 0 | 2 | 4 | 5 | 4 | 42 |

1017 Table S2. Estimated number of items,  $k$ , sampled by participants assuming absence of integration noise.

1018 In summary, subsampling is unlikely to explain the observed reduction in accuracy for  
1019 trials with high stimulus variability, and provides no explanation for the slower responses observed  
1020 by participants or for the apparent blindness to the performance cost associated with high stimulus  
1021 variability. We therefore argue that integration noise provides the best account of the reduction in  
1022 accuracy and the delay in responses observed for trials with high stimulus variability, and that  
1023 blindness to this noise is the most parsimonious explanation of the overconfidence, lack of usage  
1024 of the opt-out option and lack of influence of the prior cue observed for trials with high stimulus  
1025 variability.

## 1026 *Response times*

1027 In many tasks, response times provide experimenters with further information about the  
1028 computational processes that lead to a decision, with response times varying with the 1) difficulty  
1029 of a decision as well as 2) the confidence with which it was made.

1030 First, difficult decisions require more deliberation, and response times therefore tend to be  
1031 slower for harder stimuli. In our task, response times were indeed slower for the low- $c$  and the  
1032 high- $v$  conditions compared to the baseline condition (baseline<low- $c$ :  $t(39) = 2.6$ ,  $p < .05$ ;  
1033 baseline<high- $v$ :  $t(39) = 6.15$ ,  $p < .001$ ; see **Fig. S5**). However, response times were even slower  
1034 for the high- $v$  compared to the low- $c$  condition (low- $c$ <high- $v$ :  $t(39) = 4.0$ ,  $p < .001$ ), despite equal



1035 levels of choice accuracy in the two conditions. Analysis of the full data set (ANOVA) confirmed  
1036 that response times increased with variability (main effect of variability:  $F(1.5,29.0) = 28.55, p <$   
1037  $.001$ ), whereas response times did not vary directly with contrast (main effect of contrast:  $F(1,39)$   
1038  $= 0.09, p > .75$ ), only through an interaction with variability ( $F(1.8,72.7) = 13.06, p < .001$ ).  
1039 Overall, our argument that integration noise results from an increased difficulty for integrating  
1040 variable or discordant pieces of information is supported by the slower response times observed  
1041 for conditions with high stimulus variability.

1042 Second, there are two different ways of thinking about the relationship between confidence  
1043 to response times. On one hand, we – the experimenters – can use response times as a proxy for  
1044 participants' confidence. However, this relationship may not be straightforward; quick responses  
1045 could reflect either rapid guesses or high certainty, and slow responses could reflect thoughtful  
1046 deliberation or high uncertainty (Pleskac & Busemeyer, 2010). On the other hand, participants  
1047 may themselves use the time it took them to make a decision as a cue to how likely their decision  
1048 is to be correct. By recording both response times and confidence judgments, we could investigate  
1049 the contribution of response times to confidence over and above relevant stimulus features  
1050 (average orientation, contrast and variability). The incentive-compatible scoring procedure applied  
1051 to participants' responses meant that participants, to maximise reward, should make as many  
1052 correct decisions as possible and estimate the probability that a choice is correct as accurately as  
1053 possible. As demonstrated by the trial-by-trial analysis of confidence presented in **Fig. 3B**, slower  
1054 response times were indeed associated with a decrease in confidence (see **Fig. 3B**). In other words,  
1055 participants utilised response times as a cue to confidence. However, the analysis also shows that,  
1056 because there were additional influences on confidence (e.g., average orientation and variability).  
1057 response time is a poor proxy for participants' confidence.

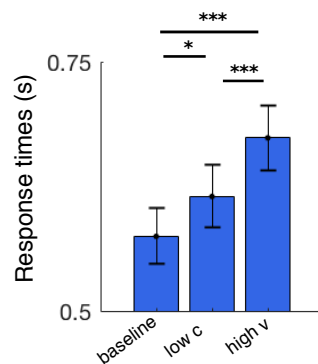

1058 **Fig. S5. Response times for critical conditions.** Response times were fastest for the baseline condition,  
1059 and slowest for the high-v condition. Data is from neutral trials (Exp1-2) and represented as group mean  $\pm$   
1060 SEM.

1061 *Accuracy gain*

1062 In our task, participants had an opportunity to compensate for poor performance when the  
1063 informative prior cue (Exp1-2) or an opt-out option(Exp4) was available. Under the noise-  
1064 blindness account, such an accuracy gain on 'extra-information' trials compared to neutral trials  
1065 should be higher for the low-c than the high-v condition, unless participants employed other  
1066 strategies which allowed them to compensate for the errors associated with stimulus variability

1067 (e.g., by deliberating for longer at the expense of slower responses). To test these predictions, we  
1068 computed the difference in choice accuracy between ‘extra-information’ and neutral trials:  
1069  $Accuracy_{gain} = Accuracy_{extra\_information} - Accuracy_{neutral}$ . In line with our hypothesis,  
1070 accuracy gains (**Fig. S6**) were higher on high-c than high-v trials for participants and the noise-  
1071 blind model, but not for the omniscient and the variability-mixer models.

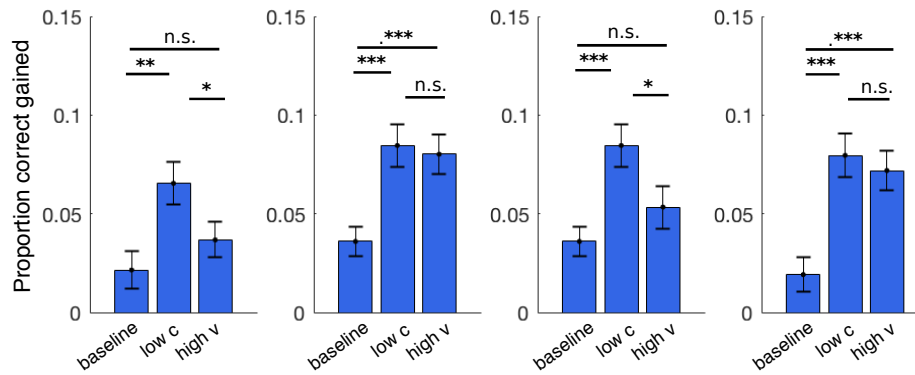

1072

1073 **Fig. S6. Accuracy gain for critical conditions.** Accuracy gain is measured as the difference in choice  
1074 accuracy between ‘extra-information’ and neutral trials (with positive values meaning higher accuracy for  
1075 ‘extra-information’ trials). From left to right, the panels show the accuracy gain for participants, the  
1076 omniscient model, the noise-blind model, and the variability-mixer model, respectively. Data is from Exp1-  
1077 3 and represented as group mean  $\pm$  SEM.
